# Supplementary material for: Remote cognitive assessment of older adults in rural areas by telemedicine and automatic speech and video analysis: protocol for a cross-over feasibility study
Source: PubMed Central journal article supplement — BMJ Open. 2021 Sep 2;11(9):e047083. doi: 10.1136/bmjopen-2020-047083 (PMC8413472; doi:10.1136/bmjopen-2020-047083), 2021-09-02
Supplement: bmjopen-2020-047083.draft_revisions.pdf [file bmjopen-2020-047083.draft_revisions.pdf]

# BMJ Open

BMJ Open is committed to open peer review. As part of this commitment we make the peer review history of every article we publish publicly available.

When an article is published we post the peer reviewers' comments and the authors' responses online. We also post the versions of the paper that were used during peer review. These are the versions that the peer review comments apply to.

The versions of the paper that follow are the versions that were submitted during the peer review process. They are not the versions of record or the final published versions. They should not be cited or distributed as the published version of this manuscript.

BMJ Open is an open access journal and the full, final, typeset and author-corrected version of record of the manuscript is available on our site with no access controls, subscription charges or pay-per-view fees (<http://bmjopen.bmj.com>).

If you have any questions on BMJ Open's open peer review process please email [info.bmjopen@bmj.com](mailto:info.bmjopen@bmj.com)

# BMJ Open

## Remote Cognitive Assessment of Older Adults in Rural Areas by Telemedicine and Automatic Speech & Video Analysis: protocol for a randomized controlled feasibility study

|                               |                                                                                                                                                                                                                                                                                                                                                                                                                                                                                                                                                                                                                                                                                                                                                                                                                                                                                                                                                                                                                                                                                                                                                                                                                                                                             |
|-------------------------------|-----------------------------------------------------------------------------------------------------------------------------------------------------------------------------------------------------------------------------------------------------------------------------------------------------------------------------------------------------------------------------------------------------------------------------------------------------------------------------------------------------------------------------------------------------------------------------------------------------------------------------------------------------------------------------------------------------------------------------------------------------------------------------------------------------------------------------------------------------------------------------------------------------------------------------------------------------------------------------------------------------------------------------------------------------------------------------------------------------------------------------------------------------------------------------------------------------------------------------------------------------------------------------|
| Journal:                      | <i>BMJ Open</i>                                                                                                                                                                                                                                                                                                                                                                                                                                                                                                                                                                                                                                                                                                                                                                                                                                                                                                                                                                                                                                                                                                                                                                                                                                                             |
| Manuscript ID                 | bmjopen-2020-047083                                                                                                                                                                                                                                                                                                                                                                                                                                                                                                                                                                                                                                                                                                                                                                                                                                                                                                                                                                                                                                                                                                                                                                                                                                                         |
| Article Type:                 | Protocol                                                                                                                                                                                                                                                                                                                                                                                                                                                                                                                                                                                                                                                                                                                                                                                                                                                                                                                                                                                                                                                                                                                                                                                                                                                                    |
| Date Submitted by the Author: | 19-Nov-2020                                                                                                                                                                                                                                                                                                                                                                                                                                                                                                                                                                                                                                                                                                                                                                                                                                                                                                                                                                                                                                                                                                                                                                                                                                                                 |
| Complete List of Authors:     | <p>König, Alexandra; Institut National de Recherche en Informatique et en Automatique Centre de Recherche Sophia Antipolis Méditerranée, STARS Team; Université Côte d'Azur, Cobtek (Cognition-Behaviour-Technology) Lab, FRIS</p> <p>Zeghari, Radia; Université Côte d'Azur, Cobtek (Cognition-Behaviour-Technology) Lab, FRIS</p> <p>Guerchouche, Rachid; Institut National de Recherche en Informatique et en Automatique Centre de Recherche Sophia Antipolis Méditerranée, STARS Team; Université Côte d'Azur, Cobtek (Cognition-Behaviour-Technology) Lab, FRIS</p> <p>Duc Tran, Minh; Institut National de Recherche en Informatique et en Automatique Centre de Recherche Sophia Antipolis Méditerranée, STARS team</p> <p>Bremond, François; Institut National de Recherche en Informatique et en Automatique Centre de Recherche Sophia Antipolis Méditerranée, STARS Team</p> <p>Linz, Nicklas; German Research Centre for Artificial Intelligence Saarbrücken Branch</p> <p>Langel, Kai; Janssen Healthcare Innovation</p> <p>Lemoine, Pascale; Centre Hospitalier de Digne-les-Bains</p> <p>Bultingaire, Vincent; Centre Hospitalier de Digne-les-Bains</p> <p>Robert, Philippe; Université Côte d'Azur, Cobtek (Cognition-Behaviour-Technology) Lab, FRIS</p> |
| Keywords:                     | Telemedicine < BIOTECHNOLOGY & BIOINFORMATICS, Dementia < NEUROLOGY, Old age psychiatry < PSYCHIATRY, Health informatics < BIOTECHNOLOGY & BIOINFORMATICS, Clinical trials < THERAPEUTICS                                                                                                                                                                                                                                                                                                                                                                                                                                                                                                                                                                                                                                                                                                                                                                                                                                                                                                                                                                                                                                                                                   |
|                               |                                                                                                                                                                                                                                                                                                                                                                                                                                                                                                                                                                                                                                                                                                                                                                                                                                                                                                                                                                                                                                                                                                                                                                                                                                                                             |

SCHOLARONE™  
Manuscripts

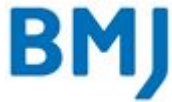

I, the Submitting Author has the right to grant and does grant on behalf of all authors of the Work (as defined in the below author licence), an exclusive licence and/or a non-exclusive licence for contributions from authors who are: i) UK Crown employees; ii) where BMJ has agreed a CC-BY licence shall apply, and/or iii) in accordance with the terms applicable for US Federal Government officers or employees acting as part of their official duties; on a worldwide, perpetual, irrevocable, royalty-free basis to BMJ Publishing Group Ltd ("BMJ") its licensees and where the relevant Journal is co-owned by BMJ to the co-owners of the Journal, to publish the Work in this journal and any other BMJ products and to exploit all rights, as set out in our [licence](#).

The Submitting Author accepts and understands that any supply made under these terms is made by BMJ to the Submitting Author unless you are acting as an employee on behalf of your employer or a postgraduate student of an affiliated institution which is paying any applicable article publishing charge ("APC") for Open Access articles. Where the Submitting Author wishes to make the Work available on an Open Access basis (and intends to pay the relevant APC), the terms of reuse of such Open Access shall be governed by a Creative Commons licence – details of these licences and which [Creative Commons](#) licence will apply to this Work are set out in our licence referred to above.

Other than as permitted in any relevant BMJ Author's Self Archiving Policies, I confirm this Work has not been accepted for publication elsewhere, is not being considered for publication elsewhere and does not duplicate material already published. I confirm all authors consent to publication of this Work and authorise the granting of this licence.

1  
2  
3  
4  
5 **Remote Cognitive Assessment of Older Adults in Rural Areas by**  
6 **Telemedicine and Automatic Speech & Video Analysis: protocol for a**  
7 **randomized controlled feasibility study**  
8  
9  
10  
11  
12

13 Authors:

14 *Alexandra König<sup>1,2</sup>, Radia Zeghari<sup>2</sup>, Rachid Guerchouche<sup>1,2</sup>, Minh Duc Tran<sup>1</sup>, François*  
15 *Bremond<sup>1</sup>, Nicklas Linz<sup>3</sup>, Kai Langel<sup>4</sup>, Pascale Lemoine<sup>5</sup>, Vincent Bultingaire<sup>5</sup> and Philippe*  
16 *Robert<sup>2,6</sup>*  
17  
18  
19  
20

21 1 Institut national de recherche en informatique et en automatique (INRIA), Stars Team,  
22 Sophia Antipolis, France

23  
24 2 Cobtek (Cognition-Behaviour-Technology) Lab, FRIS-University Côte d'azur, Nice,  
25 France  
26

27  
28 3 ki-elements, Saarbrücken, Germany  
29

30 4 Janssen Clinical Innovation, Beerse, Belgium  
31

32 5 Centre Hospitalier Digne-les-Bains, France  
33

34 6 Association Innovation Alzheimer, Nice, France  
35  
36  
37  
38  
39

40 Corresponding Author:

41 Alexandra König, PhD

42 Institut national de recherche en informatique et en automatique (INRIA),

43 Stars Team, Sophia Antipolis, France

44 Cobtek (Cognition-Behaviour-Technology) Lab

45 University Côte d'azur

46 Institut Claude Pompidou

47 10 rue Molière,

48 06100, Nice, France

49 Tel. : +33 492 034 760

50 Email : alexandra.konig@inria.fr  
51  
52  
53  
54  
55  
56  
57  
58  
59  
60

**Dates of the study:**

- Data collection: September 2019 - February 2021.
- Data analysis and dissemination: from January 2021 - end of resources.
- Ethical approval granted on 09 September 2019 by the 'Comité de protection des personnes EST-III' (Ethical committee board Hospital of Brabois, Vandoeuvre-les-Nancy, France)  
(No National : 2019-A01225-52; No CPP : 19.06.01; Protocol No.19.05.14.48028/4162)

**Data sharing statement:** No additional data are available

## Abstract

**Introduction:** Early detection of cognitive impairments is crucial for successful implementation of preventive strategies. However, in rural isolated areas or so-called ‘medical deserts’, access to diagnosis and care is very limited. With the current pandemic crisis, now even more than ever, remote solutions such as telemedicine platforms represent great potential and can help to overcome this barrier. Moreover, current advances made in voice and image analysis can help overcoming the barrier of the physical distance by providing additional information of a patients’ emotional and cognitive state. Therefore, the aim of this study is to evaluate the feasibility and reliability of a videoconference system for remote cognitive testing empowered by automatic speech and video analysis.

**Methods and analysis:** 60 participants (aged 55 and older) with and without cognitive impairment will be recruited. A complete neuropsychological assessment including a short clinical interview will be administered in two conditions, once by telemedicine and once by face-to-face. The administration procedure will be randomized. Acceptability and user experience will be assessed among participants and clinicians in qualitative and quantitative manner. Speech and video features will be extracted and analyzed to obtain additional information on mood and engagement levels. In a subgroup, measurements of stress indicators such as heart rate and skin conductance will be compared.

**Ethics and dissemination:** The procedures are not invasive and there are no expected risks or burdens to participants. All participants will be informed that this is an observational study and their consent taken prior to the experiment. Demonstration of the effectiveness of such technology make it possible to diffuse its use across all rural areas (‘medical deserts’) and thus, to improve the early diagnosis of neurodegenerative pathologies, while providing data crucial for basic research. Results from this study will be published in peer-reviewed journals.

*Keywords: telemedicine, telehealth, cognitive assessment, videoconference, neuropsychology, dementia prevention, speech analysis, video analysis, language and image processing*

### Strengths and limitations of this study

- The study aims to evaluate the use of a specifically developed and tailored videoconference system for administering remotely a complete cognitive and psychological assessment
- Additional audio and video features for emotion and engagement detection as well as objective stress measurements will be captured
- A mobile unit will test the use of the system in an equipped van which comes to the participants' home
- The sample size is relatively low since the study is limited in time
- Selection bias may be that only participants open to the use of technology are willing to participate even if usage does not require any real interaction with the system

## Introduction

With the current pandemic crisis, now even more than ever, technical solutions such as telemedicine platforms are of great importance to provide isolated elderly people with timely and sufficient access to healthcare. Moreover, in regard to this, the journal 'Lancet' published an article underlining important negative consequences of social isolation on older adults<sup>1</sup> and that online technologies represent a promising solution to overcome these problems, by providing support and connection to health care professionals.

Today, many barriers, such as social isolation, still often hinder early diagnosis of cognitive and affective disorders such as dementia which is crucial for timely treatment and management since lately the benefits of prevention strategies have been clearly demonstrated<sup>2</sup>. For older adults living in rural isolated areas, it is particularly challenging due to the limited access and long travel times to specialized clinics, causing complete exclusion and thus, under representation of this population in clinical trials.

New methods for remote screening and monitoring of people at risk are sorely needed. Additionally, the increasing risks caused by social isolation among older people in these areas have to be addressed rapidly. For this, over the past years, Information and communication technologies (ICT) have been employed in the field of dementia research with attempts of using computerized cognitive testing, sensors, automatic speech or image analysis for more objective and standardized evaluation of patients cognitive, behavioral and emotional states<sup>3</sup>. Furthermore, several studies have investigated the use of telemedicine for remote cognitive assessments of dementia disorders<sup>4-5</sup>.

The use of videoconference-mediated telemedicine is gradually increasing in diverse patient care settings including primary care, critical care, neurology, behavioral health, and psychiatry, among other specialty areas. Lately, review studies show that a certain number of cognitive tests can be administered remotely with reliable results compared to face-to-face assessment with psychologists at a clinic<sup>6-8</sup>. Acceptability assessments show as well that this form of being assessed is relatively well tolerated by the users<sup>9</sup>.

However, most studies performed focused just one or a few cognitive tests using already existing video-conference platforms such as ©Skype. Hence, it would be important to evaluate the feasibility of remote administration of a complete neuropsychological assessment including multiple tests of cognitive functions as well as a typical anamnesis interview. One hypothesis



1  
2  
3 is, that clinicians seem hesitant in adopting telemedical technology due to the feeling of distance  
4 to their patients; they report the difficulty of extracting sufficient non-verbal cues on a patients'  
5 emotional state via this administration method. Today, with the advances in Artificial  
6 Intelligence (AI) empowered speech, language and image processing, it is possible to extract  
7 additional sophisticated and unobtrusive natural biomarkers from the videoconference-based  
8 consultations and provide it back to the clinician as feedback for a better understanding of a  
9 patients' behavior and differential diagnosis. These sensor-based technologies can provide rich  
10 information about cognitive and emotional characteristics, such as for instance, prosodic  
11 features from speech for mood detection<sup>10-11</sup>, or head and eye directions from video for  
12 indicating engagement levels<sup>12-13</sup>. This can be used to help with the process of clinical decision-  
13 making during consultations, improving diagnostic precision and overcoming the lack  
14 communication cues provided usually in face-to-face interactions. New perceptual analysis,  
15 (computer vision algorithms and natural language processing) can add more quantitative  
16 information to the interactions such dynamics and intensity of behaviors<sup>14</sup>.

17  
18  
19  
20  
21  
22 For this, a videoconference system tool was developed (Figure 1.) and specifically designed to  
23 perform remotely a full range of neuropsychological tests supporting early detection and  
24 monitoring of cognitive disorders. In addition to already existing videoconference tools, it has  
25 two different adapted interfaces, one for the clinician (left image) with all tests implemented  
26 and available in a platform with its visual content and scoring system and one very simplified  
27 for the patient (right image) showing mainly the clinician or the test content. For each test,  
28 speech and video can be recorded.

29  
30  
31  
32  
33  
34  
35  
36  
37  
38  
39  
40  
41  
42  
43  
44  
45 *Figure 1. Clinician and Patient interfaces of the videoconference tool; on the left side the clinician can access*  
46 *all different tests, control the visual content for the patient, score performances and record speech and video.*  
47 *The interface shows in the center the video of the patient and on the right a feedback video of the clinician. On*  
48 *the right side, the patient's interface which displays mainly in the center the video of the clinician or the test*  
49 *content.*  
50  
51  
52  
53  
54

55 This tool could allow older adults living in rural areas access to enrollment in future clinical  
56 dementia trials and thus, more effective interventions resulting in the reduction of overall costs  
57 associated with treatment and rehabilitation<sup>15</sup>. For patients, it could offer the comfort of flexible  
58 usage without visiting physically specialized clinicians.  
59  
60

1  
2  
3  
4  
5 Over the past years, in many of France's rural regions, a crisis of medical 'desertification' can  
6 be witnessed caused by a gradual steady decline in numbers of local doctors. The region around  
7 Digne-les-Bains in south-east of France is one of the most affected, requiring urgently novel  
8 solutions to address the problem of accessing specialized adequate healthcare.  
9  
10  
11  
12

13 The overall aim of the current study is to evaluate the use of this system for administering  
14 remote cognitive assessments to isolated elderly. For this, a randomized controlled feasibility  
15 study will be performed in the rural areas in South-East of France (Digne-les-Bains). The study  
16 will target 1) results from videoconference administration of a complete neuropsychological  
17 assessment will be compared to the classical face-to-face administration, 2) acceptability  
18 among the users, patients as clinicians, will be assessed and 3) speech features as well as  
19 information on facial expressions and posture will be additionally extracted and compared to  
20 classical assessment scales. Moreover, these features might help indicating levels of  
21 engagement, stress, fatigue or mood states.  
22  
23  
24  
25  
26  
27  
28  
29

## 30 **Methods and analysis**

### 31 *Objectives*

32  
33  
34 We aim to deploy and test a specifically designed videoconference system for cognitive testing  
35 under real conditions of a clinical feasibility study.  
36  
37  
38  
39

- 40 1. Evaluate the new telemedical service in terms of clinical relevance & usability and  
41 acceptability
  - 42 a) Evaluate the reliability of the different cognitive tests administered through the  
43 videoconference system to isolated older adults living in rural areas
  - 44 b) Assess acceptability of videoconference modality among the users  
45 qualitatively and quantitatively
  - 46 c) Identify speech, language and video features automatically extracted, which  
47 correlate with cognitive performance and neuropsychiatric/psychological  
48 symptoms (e.g., depression, apathy, anxiety), as measured by standard clinical  
49 cognitive and behavioral assessments.
  - 50 d) Support the proposed speech analysis by a complementary computer-vision  
51 based analysis. Such analysis exploits advanced methods related to automated  
52  
53  
54  
55  
56  
57  
58  
59  
60

1  
2  
3 face analysis, tracking, detection and recognition, as well as human behavior  
4 analysis (capturing mood, levels of engagement in tasks and levels of arousal).  
5  
6  
7

### 8 *Participants*

9  
10 For this non-interventional observational study, 60 older adults will be recruited (age  $\geq 55$ )  
11 from the region of Digne-les-Bains, France over an inclusion period of 12 months. Participants  
12 will be referred by the local Hospital Center's memory clinic, general practitioners and/or the  
13 ADMR (*Aide à domicile en milieu rural*/ Home services in rural areas) Federation. Those  
14 interested in the study, will receive an information sheet. On attendance, a member of the  
15 research team will address any potential queries and take informed consent, prior to the  
16 experiment.  
17  
18  
19  
20  
21

22 Main inclusion criteria are

- 23 • Lives in the region of Digne-les-Bains
- 24 •  $\geq 55$  years old
- 25 • Speaks French as a first language
- 26 • Can independently understand the informed consent form, and voluntarily consents to  
27 participate, OR has an alternate decision maker who can provide consent on their behalf  
28 while the participant provides assent.  
29  
30  
31  
32  
33

34 Exclusion criteria are:

- 35 • Has significant vision problems which would impact ability to perceive visual stimuli
- 36 • Has significant auditory problems which would impact ability to understand verbal  
37 prompts  
38  
39  
40  
41  
42

### 43 *Patient and public involvement*

44 Participants were not directly involved in the development of the protocol and research  
45 questions. However, the association ADMR is working very closely with isolated elderly and  
46 represents an important partner in this project. Its members were involved from the early  
47 beginning on of the planning and their input shaped the overall design of the study. Focus  
48 groups with participants will be organized to gather feedback on the experience of the  
49 videoconference-based administration procedure.  
50  
51  
52  
53  
54  
55  
56  
57  
58  
59  
60

### *Study protocol*

A neuropsychological assessment (see Table 1.) consisting of a clinical interview followed by a set of cognitive tests (memory, attention, etc.) will be administered face-to-face and two weeks later remotely via a videoconference system by two different psychologists. This procedure will be randomized so that half of the participants will experience first the face-to-face and the other half the videoconference administration at first. The tests will be the same but different versions in order to avoid a learning effect (see Figure 2.).

*Figure 2. Study protocol design*

For those participants, who live further away, it is planned to perform the videoconference administration nearby their home with the help of a van equipped with a computer connected to 4G internet. The participants will sit in the van and connect to the psychologist via the system on a dedicated laptop. In this way, the scenario of testing remotely those who are living very isolated, will be evaluated as well.

After inclusion of all participants, results obtained at the videoconference administration will be compared to the classical face-to-face method to evaluate their reliability. Evaluation reports of the neuropsychological assessments obtained in this study will be sent to the referring clinicians of the hospital in Digne-les bains. Participants of the study will be asked to complete a questionnaire on their experience and acceptability of the videoconference-administered assessment (compared to the classical) and a subgroup, as well as other stakeholders, to participate in a focus group and semi-structured qualitative interviews in order to assess, in more depth, the feasibility and the usability of the system.

A corpus of videos and speech samples will be created for further analysis. Features, potentially relevant for early detection of cognitive disorders and/or behavioral and psychological symptoms, will be extracted. Speech, language and video features extracted during the videoconference administration will be compared partly to manual annotations of the psychologists (information regarding engagement, mood and arousal), and partly to information extracted during the clinical interview and scales/questionnaires on the presence of behavioral and psychological symptoms (depression, apathy, etc.).

The level of stress during face-to-face and remote assessment administration will be measured in a subgroup of participants with a bracelet (Empatica E4<sup>16</sup>) measures physiological data in real time.

### **Protocol of the Assessment:**

| Description                                                                                                                                                                                                                                  |
|----------------------------------------------------------------------------------------------------------------------------------------------------------------------------------------------------------------------------------------------|
| 1. Psychologist will call the patient through teleconference system                                                                                                                                                                          |
| 2. Short introduction about aim and procedures                                                                                                                                                                                               |
| 3. Informed consent                                                                                                                                                                                                                          |
| 4. Clinical interview: Demographic information, Medical history, Subjective memory complaint; Scales: Subjective Cognitive Functioning (SCF- 4 items) <sup>17</sup> , Mood (GDS-15 item) <sup>18</sup> , Apathy Inventory (IA) <sup>19</sup> |
| 5. Test of global cognition (MMSE <sup>20</sup> )                                                                                                                                                                                            |
| 6. Visual episodic memory test (Free and Cued Selective Reminding Test <sup>21</sup> if MMSE < 20 ; 5 word test of Dubois <sup>22</sup> )                                                                                                    |
| 7. Praxis Test <sup>23</sup>                                                                                                                                                                                                                 |
| 8. Visual recognition test (Doors and People Test) <sup>24</sup>                                                                                                                                                                             |
| 9. Working memory task (Digit Span Test) <sup>25</sup>                                                                                                                                                                                       |
| 10. Open questions (positive/negative story telling) <sup>26</sup>                                                                                                                                                                           |
| 11. Verbal episodic memory recall                                                                                                                                                                                                            |
| 12. Stroop test <sup>27</sup>                                                                                                                                                                                                                |
| 13. Semantic (animals/fruits) and Phonemic ('p'/'r') fluency tasks <sup>27</sup>                                                                                                                                                             |
| 14. Picture description (Cookie Theft picture) <sup>28</sup>                                                                                                                                                                                 |
| 15. Denomination task (Lexis <sup>29</sup> /DO80 <sup>30</sup> )                                                                                                                                                                             |

1  
2  
3  
4 13. Completion of conversation with patient, including providing information about the procedure  
5 of the study (face-to-face assessment)  
6  
7

8 14. User experience questionnaire (*copy under supplementary file*)  
9  
10

11  
12 *Table 1. Protocol overview*  
13  
14  
15  
16  
17  
18  
19  
20  
21  
22  
23  
24  
25  
26  
27  
28  
29  
30  
31  
32  
33  
34  
35  
36  
37  
38  
39  
40  
41  
42  
43  
44  
45  
46  
47  
48  
49  
50  
51  
52  
53  
54  
55  
56  
57  
58  
59  
60

## Data collection, management and analysis

### *Data Collection*

Data will be collected at the Hospital Center in Digne-les-Bains; the assessments will be performed remotely and face-to-face by clinicians from the Memory Clinic in Nice. For remote assessments, the videoconference software will record scores, videos and speech and store them on a dedicated secured server complying with healthcare data hosting regulations. Other clinical and neuropsychological data collected by the clinicians will follow the standard practice of the center.

Prior to initial participation in the study, each participant will consent on paper, or an alternate decision maker will consent and the participant will provide assent. Each individual (or dyad) will be given as much time as they need to review the consent form, and decide whether they want to participate. The consent only needs to be provided once, before initial participation in the study.

Subsequent completions of additional sessions do not require additional consent. Each participant will be associated with a unique, randomly generated, non-personally-identifying number ("participant ID"). During their first session, upon providing consent to participate, the participant will be asked to provide general demographic data (e.g., month and year of birth, sex, number of years of education, spoken languages, previous history of dementia, etc.); responses will be associated with the appropriate participant ID. If consent is provided by an alternate decision maker, these data will be asked of them. This information will be used to control for confounding variables when conducting analyses of the collected data, and will only be reported anonymously or in aggregate.

### *Data availability*

Since we will collect highly sensitive data, only processed data may be possible to be obtained from a third party but will not be made publicly available.

### *Acceptability evaluation*

All participants will be asked to answer a questionnaire (*copy under supplementary file*) on the acceptance of the videoconference as well as of the face-to-face modality for cognitive testing including 7 questions with a response ranging from 1 to 7, where 1=I strongly disagree and 7=I strongly agree. This questionnaire assesses the user experience, including an overall evaluation,

1  
2  
3 if participants are satisfied, if they want to repeat the experience, attitudes and clarity of  
4 instructions as well as what type of method is preferred and why, and what could be improved.  
5  
6  
7  
8

### 9 *Speech data*

10  
11 The speech of the different participants will be recorded as audio files and this for different  
12 cognitive tests. Depending on the test, the recorded speech is either free speech, or direct  
13 answers to question or verbal and visual stimuli.  
14  
15

16 We will directly record the speech of the patients. From the audio files, we will use automatic  
17 speech recognition (ASR) to obtain textual transcripts of the recordings. A subset or all of the  
18 data will be manually transcribed for comparison between automated and manual  
19 transcriptions.  
20  
21  
22

23 We will use either the internal microphone of the device (PC or tablet) or an external  
24 microphone for better recording quality. The recorded data are automatically stored on the  
25 secured server.  
26  
27  
28  
29

### 30 *Video data*

31 Towards our general goal to detect and monitor remotely cognitive decline in the context of  
32 dementia in a partially automated way, we intend to support the proposed speech analysis by a  
33 complementary computer-vision based analysis. Such analysis exploits advanced methods  
34 related to automated face analysis, tracking, detection and recognition, as well as human  
35 behavior analysis.  
36  
37  
38  
39  
40

41  
42 Firstly, we plan to record 2D video-data from all participants for the computer vision-based  
43 analysis. Then we intend to study this data with focus to find facial/gestural behaviors and  
44 facial/gestural activities that is representative for cognitive performance and neuropsychiatric  
45 symptoms of dementia in different situations, such as free speech interviews, and in some  
46 cognitive tests (e.g., patients are encouraged to describe the content of a series of images).  
47  
48  
49  
50

51  
52 We intend to acquire the video data using the integrated web-camera of the device (PC or  
53 Tablet) used for the telemedicine session. Possible use of an external web-camera connected to  
54 a PC is also considered. In both cases, the recorded data are automatically stored on the secured  
55 server.  
56  
57  
58  
59  
60



### *Stress measure data*

We would like to explore the use of additional objective markers of stress levels within this study. For this, for only a subgroup of participants (during the mobile home unit phase), we will extract through the Empatica E4 device physiological data during both administration methods:

- Electro-Dermal Activity (EDA): measures sympathetic nervous system activity manifested through the skin, by measuring the constantly fluctuating changes in certain electrical properties of the skin;
- Heart Rate Variability (HRV): derived from measuring Blood Volume Pulse (BVP);
- Peripheral Skin temperature: measured using and integrated Infrared Thermopile;
- 3-axis Accelerometer: captures motion-based activity, which identifies intensity and frequency of movements that could be a seizure.

We aim to compare the different time point measures with each other in order to assess the stress levels of the participants during the face-to-face and the remote assessment administration.

### *Data security*

Collection of data will be made with the videoconferencing web-based platform (telemedicine tool). Digital data (audio -or speech, video, recorded scores, answers to questionnaires) as well as paper data (written records) will be collected.

Concerning the paper data, they will be stored in armoires with limited access to clinicians participating in the study (a key is needed for access). Each involved clinical partner will store these papers in his clinic. The data will be digitized through the web-platform in order to conduct the research work. In the following paragraphs, we provide details about the security of all digital data.

To perform the study, a secured connection to the web-platform is required by both clinicians and participant subjects. The secured and encrypted connection (i.e., HTTPS) requires authentication with an email address and an encrypted password. Only limited email addresses' domains will be allowed to connect to the web-platform. The clinician should have a professional email which is provided by his organization (such as "@chu-nice.fr", "@ch-

1  
2  
3 digne.fr” ...). The allowed domains should be those of clinical partners involved in the clinical  
4 study.  
5  
6  
7

8 The enrolled subjects will have an authorized access to the web-platform with their email and  
9 a temporary generated password valid only for the time of their participation in the study. The  
10 password will be entered by the person accompanying the subject (a clinician, part of the  
11 clinical study) to connect the subject to the platform. For the subjects who have no email, they  
12 will be provided by a unique identifier (temporary email).  
13  
14  
15  
16  
17

18 The collected data during the study are stored in a secured encrypted database. The database  
19 will be hosted by the Institute Claude Pompidou (ICP) servers. These servers are owned and  
20 part of University Hospital of Nice (CHU NICE). These servers are secured and respond to all  
21 the norms of security and healthcare data hosting regulations. The security of the servers is  
22 managed by the IT personnel of CHU NICE.  
23  
24  
25  
26  
27

28 An IT technician from the ICP will administer the database. He will have all the rights on the  
29 database:  
30

- 31 ● Create/delete/edit the list of clinicians who can access to the web-platform.
- 32 ● Create/delete/edit the list of subjects participating to the clinical study.
- 33
- 34
- 35
- 36

37 The authorized clinicians will have the right to access to the web-interface, which will allow  
38 them to perform the study. The collected data are automatically stored in the database.  
39  
40  
41

42 The access to the stored data is strictly reserved to the clinicians with a secured account. The  
43 type of database is MySQL DataBase. The security of the database is ensured by its encryption  
44 using *AES (Advanced Encryption Standard) techniques*. The following rules will be applied:  
45  
46  
47

- 48 ● the database is accessible from trusted hosts only,
- 49 ● no use of data from input without filtering,
- 50 ● all types of data are protected,
- 51 ● the administrator of the database is not a user (the IT technician) of the web platform.
- 52
- 53
- 54
- 55

56 Security of transmission between clinicians and participants during study sessions: After the  
57 clinician and the participant are connected to the platform, video streams are circulating in both  
58 directions. Video stream are protected by integrating the following rules:  
59  
60

- The sessions of the clinical study are scheduled by the involved clinicians and are not publicly known.
- We add a signaling protocol that provides an encryption of signaling traffic.
- The connection between the clinician and the patient is a P2P connection, the media contents (audio and video channels) are transmitted between peers directly in full duplex. Thus, as the signaling server maintains the number of peers in communication, we monitor the connection for addition of suspicious peers in a call session. If the number of peers actually present on signaling server is more than the number of peers interacting on the connection, then it could mean that someone is eavesdropping secretly and should be terminated from session access by force.
- Request permission from both sides to use the camera and the microphone.

The dissemination of the research results will be based on the analysis of generated pseudo-anonymous data, which doesn't include any information allowing to make any reference to the identity of participants.

#### *Data processing*

The collected data will be processed in order to generate pseudo-anonymous metadata, which will be used by the different technical and clinical partners of the project. These technical partners (who are not the clinicians involved in passing the tests and authorized to access to the participant data) will never have access to the raw data: identity of the patient, personnel information, videos and audio or any other information which allows identifying the subject. The only processed data will be: scores of tests, videos and audio files. The processing will be done on the servers of the Institute Claude Pompidou, a processing which will generate anonymous metadata which will be transmitted by the IT technician to the partners with no information about the identity of the participants. The data will be stored for a maximum period of 3 years. This is the period which allows us to do the research work, analyze the data and publish papers.

### *Analysis*

In this study, we will mainly work on the analysis of three types of data: speech, video and tests' scores. We will also perform a multi-modal analysis using speech, video and tests' scores data.

In order to verify the agreement between both administration procedures, we will compare the face-to-face test results with the videoconference -based test results. For this, mean and standard deviations for each test score will be calculated. Intraclass correlation coefficients will be used to assess agreement between the two testing formats. The ANOVA test will be used to assess if the administration modality (independent variable) was associated with any difference in total scores of the different tests (dependent variables).

### *Speech analysis*

The audio and transcribed text data will be processed to obtain acoustic, lexicosyntactic, and semantic features. First, acoustic features will be obtained from the audio samples. The audio data will be passed through frequency domain transformations to obtain standard acoustic measures used in language processing, such as Mel frequency cepstral coefficients (MFCCs) based on the cepstral representation of the acoustic signal which detects periodicity in its spectrum, jitter and shimmer measures based on irregularities in signal periodicity, recurrence period density entropy (RPDE) and pitch period entropy (PPE) based on measures of aperiodicity and noise in the signal, measures based on the frequency domain harmonics, signal to noise ratios, and filled and unfilled pause features, among others. Similar work was previously performed for the detection of signs of apathy<sup>26</sup>.

Second, syntactic measures will be obtained from transcriptions of the verbal responses, and from any written responses. The text transcripts will be parsed with a standard probabilistic context-free grammar parser, and the resulting parse trees will be searched for presence of specific syntactic constructions. Extracted syntactic features include depth of syntactic parse trees, use of subordinate and coordinate clauses, use of passive voice, use of different types of syntactic constructions (e.g., noun phrases, auxiliary verb phrases, etc.), and mean length of utterance, among others. Lexical features will be extracted from part of speech tagged transcriptions and written responses; these include relative word class usage, lexical richness

1  
2  
3 evaluated using standard measures such as type to token ratio (TTR) and Honoré's statistic,  
4 averaged age of acquisition, familiarity, and imageability, among others.

5  
6 Lastly, semantic features will be extracted from the transcriptions based on the criteria of the  
7 corresponding language task, e.g. qualitative features from the semantic verbal fluency tasks<sup>31-</sup>  
8  
9  
10  
11  
12  
13  
14  
15  
16  
17  
18  
19  
20  
21  
22  
23  
24  
25  
26  
27  
28  
29  
30  
31  
32  
33  
34  
35  
36  
37  
38  
39  
40  
41  
42  
43  
44  
45  
46  
47  
48  
49  
50  
51  
52  
53  
54  
55  
56  
57  
58  
59  
60  
33 or recall and precision-based measures of semantic content units present in a picture  
description task<sup>34</sup>. Other relevant acoustic and linguistic features may also be computed.  
Standard statistical testing techniques (e.g., t-test, ANOVA) will be used to determine the  
significance of any trends, which are detected in the data.

### *Video analysis*

21  
22  
23  
24  
25  
26  
27  
28  
29  
30  
31  
32  
33  
34  
35  
36  
37  
38  
39  
40  
41  
42  
43  
44  
45  
46  
47  
48  
49  
50  
51  
52  
53  
54  
55  
56  
57  
58  
59  
60  
Towards the analysis we will firstly annotate the data in an initial step in order to find similar  
video-sequences (e.g. such depicted patients talking, as well as such showing smiles or neutral  
states). Then we will extract permanent features that will target a behavioral analysis<sup>35-36</sup>.  
Specifically, given a video-sequence, our algorithms will detect the face, then proceed to extract  
dense trajectories from the video-sequence and represent these by facial spatio-temporal  
features, which incorporate motion of sampled points in the video-sequence. Using the  
extracted features, emotions and engagement of the patients will be computed. Based on these,  
we will perform, using the pseudo-anonymous extracted features, an analysis in order to  
correlate the emotions expressed by a patient and his engagement during the cognitive tests  
with the cognitive disorders he could be affected with. In particular, the engagement  
information of a patient during a test will be used as an indicator of the success and the  
efficiency of a cognitive test. Our approach will be validated by the acquired data, as well as  
by benchmark datasets, which are publicly available. The recorded data will only be used to  
develop, test and validate algorithms (analysis, classification, deep-learning ...) and will be  
deleted after the study.

### **Ethics, Risks and benefits**

51  
52  
53  
54  
55  
56  
57  
58  
59  
60  
The procedures are not invasive and there are no expected risks or burdens to participants. All  
participants will be informed that this is an observational study and their consent taken prior to  
the experiment. Participants with cognitive impairment may experience feelings of confusion,  
anxiety, distress, embarrassment, or sadness during participation. We mitigate against this by  
explaining sufficiently beforehand the procedure, answering possible questions and keeping the  
session relatively short. In situations where a participant is significantly distressed as a result

1  
2  
3 of participating in the study, the clinician will stop the session. Participants may withdraw from  
4 the study completely at any time. No other known risks to the participants exist. After  
5 completion of the tests, each participant will receive feedback on her/his performance as well  
6 as a summary report will be sent to the referring practitioner.  
7  
8  
9

10  
11  
12 Confidentiality aspects such as data encryption and storage comply with the GDPR and the  
13 requirements from sponsoring bodies and ethical committees. Results from this study will be  
14 published in peer-reviewed journals. However, all communications will only include results on  
15 analyses undertaken after pre-processing of the recordings, ensuring that audio- visual data will  
16 never be published or disseminated.  
17  
18  
19

20  
21  
22 The project will enable to validate a technology allowing implementing sophisticated and  
23 unobtrusive neuropsychological assessment remotely, eventually at home or at easy reachable  
24 locations to facilitate access to clinical expert sites. The solution will furthermore allow to  
25 recruit and onboard easier people living isolated in rural areas into clinical trials who are until  
26 today very underrepresented due to the lack of access to clinical sites.  
27  
28  
29  
30

### 31 32 **Conclusions**

33  
34 Demonstration of the effectiveness of this technology may later make it possible to diffuse its  
35 use across all rural areas ('medical deserts') in France and thus to improve the early diagnosis  
36 of neurodegenerative pathologies, while providing data crucial for basic research. Ultimately,  
37 it will lead to an improvement of health care access and care of isolated seniors in these regions.  
38 Furthermore, recruitment, onboarding and monitoring of potential candidates in these regions  
39 for clinical trials will be facilitated.  
40  
41  
42  
43  
44  
45

### 46 **Acknowledgements**

47  
48 This research is funded by the EIT Health Activity 19249, DeepSPA, with great support from  
49 Modis Belgium, Janssen Clinical Innovation, the Association IA, ADMR 04, and the Centre  
50 Hospitalier and the city of Digne-les-bains, France. Special thanks to Valérie DEPRAD  
51 President, Francis Kuhn and Emmanuelle Martin Vice-President of ADMR 04.  
52  
53  
54  
55

### 56 **Contributorship statement**

57  
58 All authors contributed equally to the study design and writing of the manuscript. The  
59 corresponding author attests that all listed authors meet authorship criteria and that no others  
60

meeting the criteria have been omitted.

### Competing interest statement

We have read and understood BMJ policy on declaration of interests and declare that we have no competing interests.

### Funding Statement

This work is supported by the European Institute for Innovation and Technology (EIT) – Health, grant number 19249.

### References

1. Armitage R, Nellums LB. COVID-19 and the consequences of isolating the elderly. *Lancet Public Health*. 2020 May;5(5):e256. doi: 10.1016/S2468-2667(20)30061-X. Epub 2020 Mar 20. PMID: 32199471; PMCID: PMC7104160.
2. Rakesh G, Szabo ST, Alexopoulos GS, Zannas AS. Strategies for dementia prevention: latest evidence and implications. *Ther Adv Chronic Dis*. 2017;8(8-9):121-136. doi:10.1177/2040622317712442
3. Robert, PH, Konig, A, Andrieu, S, Bremond, F, Chemin, I, Chung, PC, Dartigues, JF, Dubois, B, Feutren, G, Guillemaud, R, Kenisberg, PA, Nave, S, Vellas, B, Verhey, F, Yesavage, J, and Mallea, P, Recommendations for ICT Use in Alzheimer's Disease Assessment: Monaco CTAD Expert Meeting. *J Nutr Health Aging*, 2013. 17(8): p. 653-60
4. Kim H, Jhoo JH, Jang J. The effect of telemedicine on cognitive decline in patients with dementia. *J Telemed Telecare* 2017 Jan;23(1):149-154.
5. Timpano F, Pirrotta F, Bonanno L, et al: Videoconference-based mini mental state examination: a validation study. *Telemed J E Health* 2013; 19:931–937
6. Haralambous, B, Subramaniam, S, Hwang, K, Dow, B, LoGiudice, D. A narrative review of the evidence regarding the use of telemedicine to deliver video-interpreting during dementia assessments for older people. *Asia-Pacific Psychiatry*. 2019; 11:e12355. <https://doi.org/10.1111/appy.12355>
7. Barth, J., Nickel, F., & Kolominsky-Rabas, P.L. (2018). Diagnosis of cognitive decline and dementia in rural areas - A scoping review. *International journal of geriatric psychiatry*, 33 3, 459-474 .

- 1  
2  
3 8. Brearly, T.W., Shura, R.D., Martindale, S.L., Lazowski, R.A., Luxton, D.D., Shenal,  
4 B.V., & Rowland, J.A. (2017). Neuropsychological Test Administration by  
5 Videoconference: A Systematic Review and Meta-Analysis. *Neuropsychology Review*,  
6 27, 174-186.  
7  
8  
9
- 10 9. Dario C, Luisotto E, Dal Pozzo E, et al. Assessment of Patients' Perception of  
11 Telemedicine Services Using the Service User Technology Acceptability  
12 Questionnaire. *Int J Integr Care*. 2016;16(2):13. Published 2016 Jun 1.  
13 doi:10.5334/ijic.2219  
14  
15  
16
- 17 10. Cummins, N, Scherer, S, Krajewski, J, Schnieder, S, Epps, J and Quatieri, T. A review  
18 of depression and suicide risk assessment using speech analysis. *Speech*  
19 *Communication*, vol. 17, pp. 10–49, 2015.  
20  
21
- 22 11. Valstar, M & Pantic, M & Gratch, Jonathan & Schuller, Björn & Ringeval, Fabien &  
23 Lalanne, Denis & Torres Torres, Mercedes & Scherer, Stefan & Stratou, Giota &  
24 Cowie, Roddy. (2016). AVEC 2016: Depression, Mood, and Emotion Recognition  
25 Workshop and Challenge. 3-10. 10.1145/2988257.2988258.  
26  
27  
28
- 29 12. Dewan, M.A.A., Murshed, M. & Lin, F. Engagement detection in online learning: a  
30 review. *Smart Learn. Environ*. 6, 1 (2019). <https://doi.org/10.1186/s40561-018-0080-z>  
31  
32
- 33 13. Asteriadis, S., Karpouzis, K., & Kollias, S. (2011). The Importance of Eye Gaze and  
34 Head Pose to Estimating Levels of Attention The importance of Eye Gaze and Head  
35 Pose to estimating levels of Attention, (June). [https://doi.org/10.1109/VIS-](https://doi.org/10.1109/VIS-GAMES.2011.38)  
36 [GAMES.2011.38](https://doi.org/10.1109/VIS-GAMES.2011.38)  
37  
38
- 39 14. Scherer, S., Stratou, G., Lucas, G., Mahmoud, M., Boberg, J., Gratch, J., Rizzo, A., &  
40 Morency, L. (2014). Automatic audiovisual behavior descriptors for psychological  
41 disorder analysis. *Image Vis. Comput.*, 32, 648-658.  
42  
43  
44
- 45 15. Armaignac DL, Saxena A, Rubens M, et al. Impact of Telemedicine on Mortality,  
46 Length of Stay, and Cost Among Patients in Progressive Care Units: Experience From  
47 a Large Healthcare System. *Crit Care Med*. 2018;46(5):728-735.  
48 doi:10.1097/CCM.0000000000002994  
49  
50
- 51 16. URL : <https://www.empatica.com/en-eu/research/e4/>  
52
- 53 17. Aalten P, Ramakers IH, Biessels GJ, de Deyn PP, Koek HL, OldeRikkert MG, Oleksik  
54 AM, Richard E, Smits LL, van Swieten JC, Teune LK, van der Lugt A, Barkhof F,  
55 Teunissen CE, Rozendaal N, Verhey FR, van der Flier WM. The Dutch PARELSnoer  
56 Institute--Neurodegenerative diseases; methods, design and baseline results. *BMC*  
57  
58  
59  
60



- 1  
2  
3 Neurol. 2014 Dec 31;14:254. doi: 10.1186/s12883-014-0254-4. PMID: 25551191;  
4  
5 PMCID: PMC4301568.
- 6  
7 18. Almeida OP, Almeida SA: Short versions of the geriatric depression scale: a study of  
8  
9 their validity for the diagnosis of a major depressive episode according to ICD-10 and  
10  
11 DSM-IV. *Int J Geriatr Psychiatry* 1999, 14(10):858–865.
- 12  
13 19. Robert PH, Clairet S, Benoit M, Koutaich J, Bertogliati C, Tible O, Caci H, Borg M,  
14  
15 Brocker P, Bedoucha P. The apathy inventory: assessment of apathy and awareness in  
16  
17 Alzheimer's disease, Parkinson's disease and mild cognitive impairment. *Int J Geriatr*  
18  
19 *Psychiatry*. 2002 Dec;17(12):1099-105. doi: 10.1002/gps.755. PMID: 12461757.
- 20  
21 20. Folstein MF, Folstein SE, McHugh PR: "Mini-mental state". A practical method for  
22  
23 grading the cognitive state of patients for the clinician. *J Psychiatr Res* 1975, 12(3):189–  
24  
25 198.
- 26  
27 21. Grober E, Merling A, Heimlich T, Lipton RB. Free and cued selective reminding and  
28  
29 selective reminding in the elderly. *J Clin Exp Neuropsychol*. 1997 Oct;19(5):643-54.  
30  
31 doi: 10.1080/01688639708403750. PMID: 9408795.
- 32  
33 22. Dubois, B, Touchon, J, Portet, F, Ousset, P, Vellas, B, Michel, B (2002). The "5 words":  
34  
35 A simple and sensitive test for the diagnosis of Alzheimer's disease. *Presse médicale*  
36  
37 (Paris, France : 1983). 31. 1696-9.
- 38  
39 23. Peigneux P, Van der Linden, M (2000) « Présentation d'une batterie  
40  
41 neuropsychologique et cognitive pour l'évaluation de l'apraxie gestuelle », *Revue de*  
42  
43 *neuropsychologie*, vol. 10, n° 2, 2000, p. 311-362
- 44  
45 24. Baddeley A. D., Emslie H., & Nimmo-Smith I. (1994). *The Doors and People Test: A*  
46  
47 *test of visual and verbal recall and recognition*. Bury-St-Edmunds, UK: Thames Valley  
48  
49 *Test Company*.
- 50  
51 25. Botwinick, J., & Storandt, M. (1974). *Memory, related functions and age*. Springfield,  
52  
53 *IL: Thomas*.
- 54  
55 26. König A, Linz N, Zeghari R, Klinge X, Tröger J, Alexandersson J, Robert P. Detecting  
56  
57 Apathy in Older Adults with Cognitive Disorders Using Automatic Speech Analysis. *J*  
58  
59 *Alzheimers Dis*. 2019;69(4):1183-1193.
- 60  
27. Godefroy O, Gibbons L, Diouf M, Nyenhuis D, Roussel M, Black S, Bugnicourt JM;  
GREFEX study group. Validation of an integrated method for determining cognitive  
ability: Implications for routine assessments and clinical trials. *Cortex*. 2014  
May;54:51-62. doi: 10.1016/j.cortex.2014.01.016. Epub 2014 Feb 7. PMID: 24632464;  
PMCID: PMC4737650.

- 1
  - 2
  - 3
  - 4
  - 5
  - 6
  - 7
  - 8
  - 9
  - 10
  - 11
  - 12
  - 13
  - 14
  - 15
  - 16
  - 17
  - 18
  - 19
  - 20
  - 21
  - 22
  - 23
  - 24
  - 25
  - 26
  - 27
  - 28
  - 29
  - 30
  - 31
  - 32
  - 33
  - 34
  - 35
  - 36
  - 37
  - 38
  - 39
  - 40
  - 41
  - 42
  - 43
  - 44
  - 45
  - 46
  - 47
  - 48
  - 49
  - 50
  - 51
  - 52
  - 53
  - 54
  - 55
  - 56
  - 57
  - 58
  - 59
  - 60
28. Harold Goodglass, Edith Kaplan, and Barbara Barresi. 2000. Boston Diagnostic Aphasia Examination. Lippincott Williams & Wilkins.
29. De Partz, MP, Bilocq, V, De Wilde V., Seron, X, Pillon A. (2001). LEXIS, Test pour le diagnostic des troubles lexicaux chez le patient aphasique. Marseille : Solal.
30. Deloche, G, Hannequin, D. (1997). Test de Dénomination Orale d'Images. Paris : les Éditions du Centre de Psychologie Appliquée
31. König A, Linz N, Tröger J, Wolters M, Alexandersson J, Robert P, Fully Automatic Speech-Based Analysis of the Semantic Verbal Fluency Task. *Dement Geriatr Cogn Disord* 2018; 45(3-4):198-209
32. Linz, N, Tröger J, Alexandersson, J, Wolters, M., König, A. Robert, PH. Predicting Dementia Screening and Staging Scores From Semantic Verbal Fluency Performance. In proceedings of the IEEE International Conference on Data Mining (ICDM) - Workshop on Data Mining for Aging, Rehabilitation and Independent Assisted Living, 18-21 November 2017 New Orleans, USA.
33. Linz, N, Tröger J, Alexandersson, J, König, A. Using Neural Word Embeddings in the Analysis of the Clinical Semantic Verbal Fluency Task. In Proceedings of the 12th International Conference on Computational Semantics (IWCS), 19-22 September 2017 Montpellier (France)
34. Fraser, K, Meltzer, J, Rudzicz, F. (2015). Linguistic Features Identify Alzheimer's Disease in Narrative Speech. *Journal of Alzheimer's disease : JAD*. 49. 10.3233/JAD-150520.
35. J.F. Cohn, T.S. Krueger, I. Matthews, Y. Ying, M.H. Nguyen, M.T. Padilla, F. Zhou, F. De la Torre, Detecting depression from facial actions and vocal prosody, 3rd International Conference on Affective Computing and Intelligent Interaction and Workshops, 2009, pp. 1–7.
36. J. Joshi, R. Goecke, G. Parker, M. Breakspear, Can body expressions contribute to automatic depression analysis? *Proceedings of IEEE Conference on Automatic Face and Gesture Recognition*, 2013.

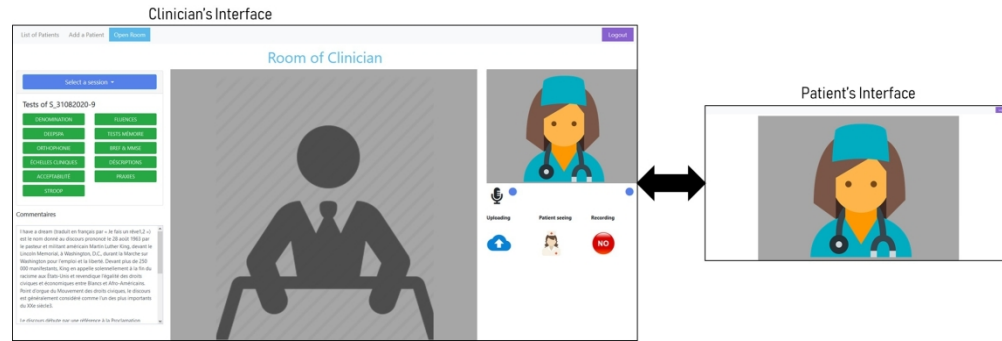

Figure 1. Figure 1. Clinician and Patient interfaces of the videoconference tool; on the left side the clinician can access all different tests, control the visual content for the patient, score performances and record speech and video. The interface shows in the center the video of the patient and on the right a feedback video of the clinician. On the right side, the patient's interface which displays mainly in the center the video of the clinician or the test content.

397x136mm (150 x 150 DPI)

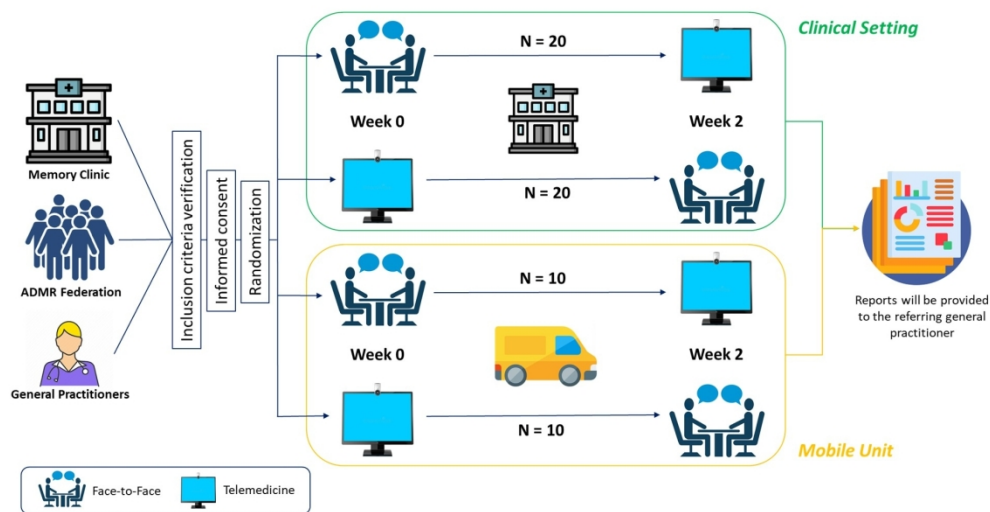

Figure 2. Study protocol design

329x176mm (150 x 150 DPI)

**User Experience assessment:**

Questionnaire on acceptance of the remote modality for cognitive testing

1. Overall, I am satisfied with the experience.

Strongly disagree

Strongly agree

|   |   |   |   |   |   |   |
|---|---|---|---|---|---|---|
| 1 | 2 | 3 | 4 | 5 | 6 | 7 |
|---|---|---|---|---|---|---|

Comment:

---



---



---

2. Overall, the system is easy to use.

Strongly disagree

Strongly agree

|   |   |   |   |   |   |   |
|---|---|---|---|---|---|---|
| 1 | 2 | 3 | 4 | 5 | 6 | 7 |
|---|---|---|---|---|---|---|

Comment:

---



---



---

3. The Instructions were clear and understandable

Strongly disagree

Strongly agree

|   |   |   |   |   |   |   |
|---|---|---|---|---|---|---|
| 1 | 2 | 3 | 4 | 5 | 6 | 7 |
|---|---|---|---|---|---|---|

Comment:

---



---



---

4. I would repeat the experience

Strongly disagree

Strongly agree

|   |   |   |   |   |   |   |
|---|---|---|---|---|---|---|
| 1 | 2 | 3 | 4 | 5 | 6 | 7 |
|---|---|---|---|---|---|---|

Comment:

---



---



---

- 1  
2  
3 5. Have you considered withdrawing from the study/experience at any time? Check  
4 your answer.  
5  
6  
7

|     |    |
|-----|----|
| YES | NO |
|-----|----|

9 Comment:  
10  
11  
12  
13  
14

---



---



---

- 15  
16 6. Which evaluation method do you prefer, face-to-face or (phone) video-conferencing?  
17 Check your answer.  
18  
19

|              |                        |
|--------------|------------------------|
| face-to-face | video-conference/phone |
|--------------|------------------------|

- 20  
21  
22  
23 7. On a scale of zero to ten, how likely are you to recommend this method of evaluation  
24 to a friend or colleague?  
25  
26

27 Strongly  
28 disagree  
29

Strongly agree  
30

|   |   |   |   |   |   |   |   |   |    |
|---|---|---|---|---|---|---|---|---|----|
| 1 | 2 | 3 | 4 | 5 | 6 | 7 | 8 | 9 | 10 |
|---|---|---|---|---|---|---|---|---|----|

31  
32  
33  
34  
35 What was missing or disappointing in your experience?  
36  
37  
38

---



---

39  
40 What do you like most/least about this procedure?  
41  
42  
43

---



---

44  
45 What is the one thing we could do to make it better?  
46  
47  
48  
49  
50  
51  
52  
53  
54  
55  
56  
57  
58  
59  
60

---



---

# BMJ Open

## Remote Cognitive Assessment of Older Adults in Rural Areas by Telemedicine and Automatic Speech & Video Analysis: protocol for a cross-over feasibility study

|                                 |                                                                                                                                                                                                                                                                                                                                                                                                                                                                                                                                                                                                                                                                                                                                                                                                                                                                                                                                                                                                                                                                                                                                                                                                                                                                                                                                                                                                                                    |
|---------------------------------|------------------------------------------------------------------------------------------------------------------------------------------------------------------------------------------------------------------------------------------------------------------------------------------------------------------------------------------------------------------------------------------------------------------------------------------------------------------------------------------------------------------------------------------------------------------------------------------------------------------------------------------------------------------------------------------------------------------------------------------------------------------------------------------------------------------------------------------------------------------------------------------------------------------------------------------------------------------------------------------------------------------------------------------------------------------------------------------------------------------------------------------------------------------------------------------------------------------------------------------------------------------------------------------------------------------------------------------------------------------------------------------------------------------------------------|
| Journal:                        | <i>BMJ Open</i>                                                                                                                                                                                                                                                                                                                                                                                                                                                                                                                                                                                                                                                                                                                                                                                                                                                                                                                                                                                                                                                                                                                                                                                                                                                                                                                                                                                                                    |
| Manuscript ID                   | bmjopen-2020-047083.R1                                                                                                                                                                                                                                                                                                                                                                                                                                                                                                                                                                                                                                                                                                                                                                                                                                                                                                                                                                                                                                                                                                                                                                                                                                                                                                                                                                                                             |
| Article Type:                   | Protocol                                                                                                                                                                                                                                                                                                                                                                                                                                                                                                                                                                                                                                                                                                                                                                                                                                                                                                                                                                                                                                                                                                                                                                                                                                                                                                                                                                                                                           |
| Date Submitted by the Author:   | 29-Apr-2021                                                                                                                                                                                                                                                                                                                                                                                                                                                                                                                                                                                                                                                                                                                                                                                                                                                                                                                                                                                                                                                                                                                                                                                                                                                                                                                                                                                                                        |
| Complete List of Authors:       | <p>König, Alexandra; Institut National de Recherche en Informatique et en Automatique Centre de Recherche Sophia Antipolis Méditerranée, STARS Team; Université Côte d'Azur, Cobtek (Cognition-Behaviour-Technology) Lab, FRIS</p> <p>Zeghari, Radia; Université Côte d'Azur, Cobtek (Cognition-Behaviour-Technology) Lab, FRIS</p> <p>Guerchouche, Rachid; Institut National de Recherche en Informatique et en Automatique Centre de Recherche Sophia Antipolis Méditerranée, STARS Team; Université Côte d'Azur, Cobtek (Cognition-Behaviour-Technology) Lab, FRIS</p> <p>Duc Tran, Minh; Institut National de Recherche en Informatique et en Automatique Centre de Recherche Sophia Antipolis Méditerranée, STARS team</p> <p>Bremond, François; Institut National de Recherche en Informatique et en Automatique Centre de Recherche Sophia Antipolis Méditerranée, STARS Team</p> <p>Linz, Nicklas; German Research Centre for Artificial Intelligence Saarbrücken Branch</p> <p>Lindsay, Hali; Deutsches Forschungszentrum für Künstliche Intelligenz GmbH Standort Saarbrücken</p> <p>Langel, Kai; Janssen Healthcare Innovation</p> <p>Ramakers, I.H.G.B; Maastricht University</p> <p>Lemoine, Pascale; Centre Hospitalier de Digne-les-Bains</p> <p>Bultingaire, Vincent; Centre Hospitalier de Digne-les-Bains</p> <p>Robert, Philippe; Université Côte d'Azur, Cobtek (Cognition-Behaviour-Technology) Lab, FRIS</p> |
| <b>Primary Subject Heading</b>: | Mental health                                                                                                                                                                                                                                                                                                                                                                                                                                                                                                                                                                                                                                                                                                                                                                                                                                                                                                                                                                                                                                                                                                                                                                                                                                                                                                                                                                                                                      |
| Secondary Subject Heading:      | Geriatric medicine, Health services research, Neurology                                                                                                                                                                                                                                                                                                                                                                                                                                                                                                                                                                                                                                                                                                                                                                                                                                                                                                                                                                                                                                                                                                                                                                                                                                                                                                                                                                            |
| Keywords:                       | Telemedicine < BIOTECHNOLOGY & BIOINFORMATICS, Dementia < NEUROLOGY, Old age psychiatry < PSYCHIATRY, Health informatics < BIOTECHNOLOGY & BIOINFORMATICS, Clinical trials < THERAPEUTICS                                                                                                                                                                                                                                                                                                                                                                                                                                                                                                                                                                                                                                                                                                                                                                                                                                                                                                                                                                                                                                                                                                                                                                                                                                          |
|                                 |                                                                                                                                                                                                                                                                                                                                                                                                                                                                                                                                                                                                                                                                                                                                                                                                                                                                                                                                                                                                                                                                                                                                                                                                                                                                                                                                                                                                                                    |

1  
2  
3  
4  
5  
6  
7  
8  
9  
10  
11  
12  
13  
14  
15  
16  
17  
18  
19  
20  
21  
22  
23  
24  
25  
26  
27  
28  
29  
30  
31  
32  
33  
34  
35  
36  
37  
38  
39  
40  
41  
42  
43  
44  
45  
46  
47  
48  
49  
50  
51  
52  
53  
54  
55  
56  
57  
58  
59  
60

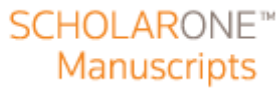





I, the Submitting Author has the right to grant and does grant on behalf of all authors of the Work (as defined in the below author licence), an exclusive licence and/or a non-exclusive licence for contributions from authors who are: i) UK Crown employees; ii) where BMJ has agreed a CC-BY licence shall apply, and/or iii) in accordance with the terms applicable for US Federal Government officers or employees acting as part of their official duties; on a worldwide, perpetual, irrevocable, royalty-free basis to BMJ Publishing Group Ltd ("BMJ") its licensees and where the relevant Journal is co-owned by BMJ to the co-owners of the Journal, to publish the Work in this journal and any other BMJ products and to exploit all rights, as set out in our [licence](#).

The Submitting Author accepts and understands that any supply made under these terms is made by BMJ to the Submitting Author unless you are acting as an employee on behalf of your employer or a postgraduate student of an affiliated institution which is paying any applicable article publishing charge ("APC") for Open Access articles. Where the Submitting Author wishes to make the Work available on an Open Access basis (and intends to pay the relevant APC), the terms of reuse of such Open Access shall be governed by a Creative Commons licence – details of these licences and which [Creative Commons](#) licence will apply to this Work are set out in our licence referred to above.

Other than as permitted in any relevant BMJ Author's Self Archiving Policies, I confirm this Work has not been accepted for publication elsewhere, is not being considered for publication elsewhere and does not duplicate material already published. I confirm all authors consent to publication of this Work and authorise the granting of this licence.

1  
2  
3  
4  
5 **Remote Cognitive Assessment of Older Adults in Rural Areas by**  
6 **Telemedicine and Automatic Speech & Video Analysis: protocol for a**  
7 **cross-over feasibility study**  
8  
9  
10  
11  
12

13 Authors:

14 *Alexandra König<sup>1,2</sup>, Radia Zeghari<sup>2</sup>, Rachid Guerchouche<sup>1,2</sup>, Minh Duc Tran<sup>1</sup>, François*  
15 *Bremond<sup>1</sup>, Nicklas Linz<sup>3</sup>, Hali Lindsay<sup>4</sup>, Kai Langel<sup>5</sup>, Inez. H.G. B. Ramakers<sup>6</sup>, Pascale*  
16 *Lemoine<sup>7</sup>, Vincent Bultingaire<sup>7</sup> and Philippe Robert<sup>2,8</sup>*  
17  
18  
19  
20

- 21 1 Institut national de recherche en informatique et en automatique (INRIA), Stars Team,  
22 Sophia Antipolis, France  
23  
24 2 Cobtek (Cognition-Behaviour-Technology) Lab, FRIS-University Côte d'azur, Nice,  
25 France  
26  
27 3 ki-elements, Saarbrücken, Germany  
28  
29 4 German Research Center for Artificial Intelligence (DFKI), Saarbrücken, Germany  
30  
31 5 Janssen Clinical Innovation, Beerse, Belgium  
32  
33 6 Maastricht University, Netherlands  
34  
35 7 Centre Hospitalier Digne-les-Bains, France  
36  
37 8 Association Innovation Alzheimer, Nice, France  
38  
39  
40  
41  
42  
43

44 Corresponding Author:

45 Alexandra König, PhD

46 Institut national de recherche en informatique et en automatique (INRIA),

47 Stars Team, Sophia Antipolis, France

48 Cobtek (Cognition-Behaviour-Technology) Lab

49 University Côte d'azur

50 Institut Claude Pompidou

51 10 rue Molière,

52 06100, Nice, France

53 Tel. : +33 492 034 760  
54  
55  
56  
57  
58  
59  
60

1  
2  
3 Email : alexandra.konig@inria.fr  
4  
5

6 **Dates of the study:**  
7

- 8 • Data collection: September 2019 - February 2021.  
9  
10 • Data analysis and dissemination: from January 2021 - end of resources.  
11  
12 • Ethical approval granted on 09 September 2019 by the 'Comité de protection des personnes  
13 EST-III' (Ethical committee board Hospital of Brabois, Vandoeuvre-les-Nancy, France)  
14 (No National : 2019-A01225-52; No CPP : 19.06.01; Protocol No.19.05.14.48028/4162)  
15  
16  
17  
18  
19  
20  
21

22 **Data sharing statement:** No additional data are available  
23  
24  
25  
26  
27  
28  
29  
30  
31  
32  
33  
34  
35  
36  
37  
38  
39  
40  
41  
42  
43  
44  
45  
46  
47  
48  
49  
50  
51  
52  
53  
54  
55  
56  
57  
58  
59  
60

## Abstract

**Introduction:** Early detection of cognitive impairments is crucial for the successful implementation of preventive strategies. However, in rural isolated areas or so-called ‘medical deserts’, access to diagnosis and care is very limited. With the current pandemic crisis, now even more than ever, remote solutions such as telemedicine platforms represent great potential and can help to overcome this barrier. Moreover, current advances made in voice and image analysis can help overcome the barrier of physical distance by providing additional information on a patients’ emotional and cognitive state. Therefore, the aim of this study is to evaluate the feasibility and reliability of a videoconference system for remote cognitive testing empowered by automatic speech and video analysis.

**Methods and analysis:** 60 participants (aged 55 and older) with and without cognitive impairment will be recruited. A complete neuropsychological assessment including a short clinical interview will be administered in two conditions, once by telemedicine and once by face-to-face. The order of administration procedure will be counterbalanced so half of the sample starts with the videoconference condition and the other half the face-to-face condition. Acceptability and user experience will be assessed among participants and clinicians in a qualitative and quantitative manner. Speech and video features will be extracted and analyzed to obtain additional information on mood and engagement levels. In a subgroup, measurements of stress indicators such as heart rate and skin conductance will be compared.

**Ethics and dissemination:** The procedures are not invasive and there are no expected risks or burdens to participants. All participants will be informed that this is an observational study and their consent taken prior to the experiment. Demonstration of the effectiveness of such technology makes it possible to diffuse its use across all rural areas (‘medical deserts’) and thus, to improve the early diagnosis of neurodegenerative pathologies, while providing data crucial for basic research. Results from this study will be published in peer-reviewed journals.

*Keywords: telemedicine, telehealth, cognitive assessment, videoconference, neuropsychology, dementia prevention, speech analysis, video analysis, language and image processing*

### Strengths and limitations of this study

- The study aims to evaluate the use of a specifically developed and tailored videoconference system for administering remotely a complete cognitive and psychological assessment
- Additional audio and video features for emotion and engagement detection as well as objective stress measurements will be captured
- A mobile unit will test the use of the system in an equipped van that goes to the participants' home
- The sample size is relatively low since the study is limited in time
- Selection bias may be that only participants open to the use of technology are willing to participate even if usage does not require any real interaction with the system

## Introduction

With the current COVID19 pandemic crisis, now even more than ever, technical solutions such as telemedicine platforms are of great importance to provide isolated elderly people with timely and sufficient access to healthcare. Moreover, in regard to this, the journal 'Lancet' published an article underlining the important negative consequences of social isolation on older adults<sup>1</sup> and that online technologies represent a promising solution to overcome these problems, by providing support and connection to health care professionals.

Today, many barriers, such as social isolation, still often hinder the early diagnosis of cognitive and affective disorders such as dementia which is crucial for timely treatment and management since lately the benefits of prevention strategies have been clearly demonstrated<sup>2</sup>.

For older adults living in rural isolated areas, it is particularly challenging due to the limited access and long travel times to specialized clinics, causing complete exclusion and thus, under-representation of this population in clinical trials.

New methods for remote screening and monitoring of people at risk are sorely needed. Additionally, the increasing risks caused by social isolation among older people in these areas have to be addressed rapidly. For this, over the past years, Information and communication technologies (ICT) have been employed in the field of dementia research with attempts of using computerized cognitive testing, sensors, automatic speech or image analysis for more objective and standardized evaluation of patients cognitive, behavioral and emotional states<sup>3</sup>. Furthermore, several studies have investigated the use of telemedicine for remote cognitive assessments of dementia disorders<sup>4-5</sup>.

The use of videoconference-mediated telemedicine is gradually increasing in diverse patient care settings including primary care, critical care, neurology, behavioral health, and psychiatry, among other specialty areas. Lately, review studies show that a certain number of cognitive tests can be administered remotely with reliable results compared to face-to-face assessment with psychologists at a clinic<sup>6-8</sup>. Acceptability assessments show as well that this form of being assessed is relatively well tolerated by the users<sup>9</sup>.

However, most studies focused on just one or a few cognitive tests using already existing video-conference platforms such as Skype©. Hence, it would be important to evaluate the feasibility of remote administration of a complete neuropsychological assessment including

1  
2  
3 multiple tests of cognitive functions as well as a typical anamnesis interview. One hypothesis  
4 is that clinicians seem hesitant in adopting telemedicine technology due to the feeling of  
5 distance to their patients; they report the difficulty of extracting sufficient non-verbal cues on a  
6 patients' emotional state via this administration method. Today, with the advances in Artificial  
7 Intelligence (AI) empowered speech, language, and image processing, it is possible to extract  
8 additional sophisticated and unobtrusive natural biomarkers from the videoconference-based  
9 consultations and provide it back to the clinician as feedback for a better understanding of a  
10 patients' behavior and differential diagnosis. These sensor-based technologies can provide rich  
11 information about cognitive and emotional characteristics, such as, for instance, prosodic  
12 features from speech for mood detection<sup>10-11</sup>, or head and eye directions from video for  
13 indicating engagement levels<sup>12-13</sup>. This can be used to help with the process of clinical decision-  
14 making during consultations, improving diagnostic precision and overcoming the lack of  
15 communication cues usually provided in face-to-face interactions. New perceptual analysis,  
16 (computer vision algorithms and natural language processing) can add more quantitative  
17 information to the interactions such dynamics and intensity of behaviors<sup>14</sup>.

18  
19  
20  
21  
22 For this, a videoconference system tool was developed (Figure 1.) and specifically designed to  
23 remotely perform a full range of neuropsychological tests supporting early detection and  
24 monitoring of cognitive disorders. In opposition to already existing videoconference tools,  
25 it has two different adapted interfaces, one for the clinician (left image) with several clinical  
26 tests implemented and available in a platform with its visual content and scoring system and  
27 one very simplified for the patient (right image) showing mainly the clinician or the test content.  
28 For each test, speech and video can be recorded.

29  
30  
31  
32  
33  
34  
35  
36  
37  
38  
39  
40  
41  
42  
43  
44  
45  
46  
47  
48  
49  
50  
51  
52  
53  
54  
55  
56  
57  
58  
59  
60  
*Figure 1. Clinician and Patient interfaces of the videoconference tool; on the left side the clinician can access all different tests, control the visual content for the patient, score performances and record speech and video. The interface shows in the center the video of the patient and on the right a feedback video of the clinician. On the right side, the patient's interface which displays mainly in the center the video of the clinician or the test content.*

This tool could allow older adults living in rural areas access to enrollment in future clinical dementia trials and thus, more effective interventions resulting in the reduction of overall costs

1  
2  
3 associated with treatment and rehabilitation <sup>15</sup>. For patients, it could offer the comfort of flexible  
4 usage without physically visiting specialized clinicians.  
5  
6  
7

8 Over the past years, in many of France's rural regions, a crisis of medical 'desertification' can  
9 be witnessed caused by a gradual steady decline in the number of local doctors. The region  
10 around Digne-les-Bains in the southeast of France is one of the most affected areas, urgently  
11 requiring novel solutions to address the lack of access to adequate specialized healthcare.  
12  
13  
14

15  
16  
17 The overall aim of the current study is to evaluate the use of this system for administering  
18 remote cognitive assessments to isolated elderly. For this, a counterbalanced cross-over  
19 feasibility study will be performed in the rural areas in the southeast of France (Digne-les-  
20 Bains). The study will target 1) results from videoconference administration of a complete  
21 neuropsychological assessment will be compared to the classical face-to-face administration,  
22 2) acceptability among the users, patients as clinicians, will be assessed and 3) speech features  
23 as well as information on facial expressions and posture will be additionally extracted and  
24 compared to classical assessment scales. Moreover, these features might help to indicate levels  
25 of engagement, stress, fatigue, or mood states.  
26  
27  
28  
29  
30  
31  
32  
33

## 34 **Methods and analysis**

### 35 *Objectives*

36  
37 We aim to deploy and test a specifically designed videoconference system for cognitive testing  
38 under real conditions of a clinical feasibility study.  
39  
40  
41  
42  
43

- 44 1. Evaluate the new telemedical service in terms of clinical relevance & usability and  
45 acceptability
  - 46 a) Evaluate the reliability of the different cognitive tests administered through the  
47 videoconference system to isolated older adults living in rural areas
  - 48 b) Assess acceptability of videoconference modality among the users  
49 qualitatively and quantitatively
  - 50 c) Identify automatically extracted speech, language, and video features, which  
51 correlate with cognitive performance and neuropsychiatric/psychological  
52 symptoms (e.g., depression, apathy, anxiety), as measured by standard clinical  
53 cognitive and behavioral assessments.  
54  
55  
56  
57  
58  
59  
60



- 1  
2  
3 d) Support the proposed speech analysis by a complementary computer-vision  
4 based analysis. Such analysis exploits advanced methods related to automated  
5 face analysis, tracking, detection and recognition, as well as human behavior  
6 analysis (capturing mood, levels of engagement in tasks and levels of arousal).  
7  
8  
9

### 10 *Participants*

11 For this non-interventional observational study, 60 older adults will be recruited (age  $\geq 55$ )  
12 from the region of Digne-les-Bains, France over an inclusion period of 12 months. Participants  
13 will be referred by the local Hospital Center's memory clinic, general practitioners, and/or the  
14 ADMR (*Aide à domicile en milieu rural*/ Home services in rural areas) Federation. Those  
15 interested in the study, will receive an information sheet. On attendance, a member of the  
16 research team will address any potential queries and take informed consent, prior to the  
17 experiment.  
18  
19  
20  
21  
22  
23

24 Main inclusion criteria are

- 25 • Lives in the region of Digne-les-Bains
- 26 •  $\geq 55$  years old
- 27 • Speaks French as a first language
- 28 • Can independently understand the informed consent form, and voluntarily consents to  
29 participate, OR has an alternate decision maker who can provide consent on their behalf  
30 while the participant provides assent.  
31  
32  
33  
34  
35

36 Exclusion criteria are:

- 37 • Has significant vision problems which would impact ability to perceive visual stimuli
- 38 • Has significant auditory problems which would impact ability to understand verbal  
39 prompts  
40  
41  
42  
43  
44

### 45 *Patient and public involvement*

46 Participants were not directly involved in the development of the protocol and research  
47 questions. However, the association ADMR is working very closely with isolated elderly and  
48 represents an important partner in this project. Its members were involved from the early  
49 beginning of the planning and their input shaped the overall design of the study. Focus groups  
50 with participants will be organized to gather feedback on the experience of the videoconference-  
51 based administration procedure.  
52  
53  
54  
55  
56  
57

### 58 *Study protocol*

1  
2  
3 A comprehensive neuropsychological assessment (see Table 1.) consisting of a clinical  
4 interview followed by a set of cognitive tests (memory, attention, etc.) will be administered  
5 face-to-face and two weeks later remotely via a videoconference system by two different  
6 psychologists. To reduce learning effect biases and within rater variability, this procedure  
7 will be counterbalanced so that half of the participants first experience the face-to-face  
8 interaction and the other half will initially receive the videoconference administration (see  
9 Figure 2.).

10 For the following tests, we will use parallel versions in order to avoid a learning effect: MMSE,  
11 Free and Cued Selective Reminding Test, Digit span test, Denomination task, and Semantic  
12 and Phonemic fluencies. The study is limited to use the video modality to verify  
13 test performances, which makes it complicated for constructional tasks that require drawing.  
14 Within the MMSE test, subjects will be asked to perform the task on a white sheet and display  
15 it in front of their camera so the clinician can evaluate it remotely.

16  
17  
18  
19  
20  
21  
22  
23  
24  
25  
26  
27 *Figure 2. Study protocol design*

28  
29  
30 For those participants, who live further away, it is planned to perform the videoconference  
31 administration nearby their home with the help of a van equipped with a computer connected  
32 to 4G internet. The participants will sit in the van and connect to the psychologist via the  
33 system on a dedicated laptop. In this way, the scenario of remotely testing those who are living  
34 very isolated will be evaluated.

35  
36  
37  
38  
39  
40 After the inclusion of all participants, results obtained at the videoconference administration  
41 will be compared to the classical face-to-face method to evaluate their reliability. Evaluation  
42 reports of the neuropsychological assessments obtained in this study will be sent to the  
43 referring clinicians of the hospital in Digne-les-Bains.

44  
45  
46  
47  
48  
49 Regarding acceptability, participants of the study will be asked to complete a questionnaire  
50 on their experience of the videoconference-administered assessment (compared to the  
51 classical). In addition a subgroup of study participants, as well as other stakeholders, will be  
52 invited to participate in a focus group with semi-structured qualitative interviews in to assess,  
53 in more depth, the ease and usability of the system.

A corpus of video and speech samples will be created for further analysis. Features, potentially relevant for early detection of cognitive disorders and/or behavioral and psychological symptoms, will be extracted. Speech, language, and video features extracted during the videoconference administration will be compared partly to manual annotations of the psychologists (information regarding engagement, mood, and arousal), and partly to information extracted during the clinical interview and scales/questionnaires on the presence of behavioral and psychological symptoms (depression, apathy, etc.).

In a subgroup of participants, stress levels will be measured during the face-to-face and remote assessment administration both subjectively via a questionnaire and quantitatively, with a bracelet (Empatica E4<sup>16</sup>) which measures physiological data in real-time.

### **Protocol of the Assessment:**

| Description                                                                                                                                                                                                                                  |
|----------------------------------------------------------------------------------------------------------------------------------------------------------------------------------------------------------------------------------------------|
| 1. Psychologist will call the patient through teleconference system                                                                                                                                                                          |
| 2. Short introduction about aim and procedures                                                                                                                                                                                               |
| 3. Informed consent                                                                                                                                                                                                                          |
| 4. Clinical interview: Demographic information, Medical history, Subjective memory complaint; Scales: Subjective Cognitive Functioning (SCF- 4 items) <sup>17</sup> , Mood (GDS-15 item) <sup>18</sup> , Apathy Inventory (IA) <sup>19</sup> |
| 5. Test of global cognition (MMSE <sup>20</sup> )                                                                                                                                                                                            |
| 6. Visual episodic memory test (Free and Cued Selective Reminding Test <sup>21</sup> if MMSE < 20; 5-word test of Dubois <sup>22</sup> )                                                                                                     |
| 7. Praxis Test <sup>23</sup>                                                                                                                                                                                                                 |
| 8. Visual recognition test (Doors and People Test) <sup>24</sup>                                                                                                                                                                             |
| 9. Working memory task (Digit Span Test) <sup>25</sup>                                                                                                                                                                                       |
| 10. Open questions (positive/negative story telling) <sup>26</sup>                                                                                                                                                                           |

|                                                                                                                                         |
|-----------------------------------------------------------------------------------------------------------------------------------------|
| 11. Verbal episodic memory recall                                                                                                       |
| 12. Stroop test <sup>27</sup>                                                                                                           |
| 13. Semantic (animals/fruits) and Phonemic ('p'/'r') fluency tasks <sup>27</sup>                                                        |
| 14. Picture description (Cookie Theft picture) <sup>28</sup>                                                                            |
| 15. Denomination task (Lexis <sup>29</sup> /DO80 <sup>30</sup> )                                                                        |
| 13. Completion of conversation with patient, including providing information about the procedure of the study (face-to-face assessment) |
| 14. User experience questionnaire ( <i>copy under supplementary file</i> )                                                              |

Table 1. Protocol overview

### Technical Description of the videoconference system

The videoconference system (or telemedicine) tool was internally developed as a web-based platform, using common web-development technologies and libraries (JavaScript, Node.JS, HTML, etc.). No Skype, Zoom, or other existing videoconferencing systems were involved. A secured server allows connecting two clients (clinician and patient) through the two interfaces described in Figure 1. Both clinician and patient connect to the platform through any existing web browsers (Chrome, Firefox, Safari, Edge) under any operating system that supports webRTC standard. WebRTC<sup>1</sup> (Web Real-Time Communication) is a free, open-source project providing web browsers and mobile applications with real-time communication (RTC) via simple application programming interfaces (APIs). It allows audio and video communication to work inside web pages by allowing direct peer-to-peer communication, eliminating the need to install plugins or download native apps.

Since the communication between the clinician and the patient is made directly through the web, the used devices (camera, microphone and speakers) are either the built-in devices when a laptop is used, or externally attached to the PC (in the case of a desktop computer for example). For a tablet or a smartphone, the integrated hardware devices is used.

<sup>1</sup> <https://en.wikipedia.org/wiki/WebRTC>

1  
2  
3  
4  
5 For practical reasons, we will use a laptop or a desktop with a minimum of a 17-inch screen  
6 width. This will make the clinical tests' contents (images and text) visible for the patients. In  
7 addition, we will use a wide-angle camera, especially for the patient's side, in order to allow  
8 the clinician to see the upper body of the patient to be able to observe gestures. This is  
9 particularly important for some clinical tests, in which seeing the patient's hands is required.

10 The videoconferencing communication requires a dedicated server to allow the transmission of  
11 different information between the two clients (clinician and patient). Servers to store different  
12 data (database, patients' information, videos, speech recordings, scores ...); and to run the  
13 different services allowing the videoconferencing communication are mandatory. All the  
14 servers will be hosted in dedicated and regulated infrastructure such as the ones of the clinical  
15 partners, and thus respect the legislation related to health data and privacy.

16 The developed system is linked to third parties cloud infrastructures allowing speech and video  
17 analysis. For the planned clinical study, audio and video data will be stored on secured servers.  
18 The processing of this data is done according to the procedure explained under Data processing.  
19 The use of speech and video analysis, in addition to providing potential digital biomarkers,  
20 helps in overcoming both the physical absence of the patient and the lack of sophisticated and  
21 complex observation devices (such as Pan-Tilt-Zoom "PTZ" cameras). By providing the  
22 clinician with meaningful information about the patient's behaviors and state (comfort, fatigue,  
23 stress), the physical distance can be potentially compensated for.  
24  
25  
26  
27  
28  
29  
30  
31  
32  
33  
34  
35  
36  
37  
38  
39  
40  
41  
42  
43  
44  
45  
46  
47  
48  
49  
50  
51  
52  
53  
54  
55  
56  
57  
58  
59  
60

## Data collection, management and analysis

### *Data Collection*

Data will be collected at the Hospital Center in Digne-les-Bains; the assessments will be performed remotely and face-to-face by clinicians from the Memory Clinic in Nice. For remote assessments, the videoconference software will record test scores, video, and speech and store them on a dedicated secured server complying with healthcare data hosting regulations. Other clinical and neuropsychological data collected by the clinicians will follow the standard practice of the center.

Prior to initial participation in the study, each participant will consent on paper, or an alternate decision-maker will consent and the participant will provide assent. Each individual (or dyad) will be given as much time as they need to review the consent form and decide whether they want to participate. The consent only needs to be provided once, before initial participation in the study.

Subsequent completion of additional sessions will not require additional consent. Each participant will be associated with a unique, randomly generated, non-personally-identifying number (“participant ID”). During their first session, upon providing consent to participate, the participant will be asked to provide general demographic data (e.g., month and year of birth, sex, number of years of education, spoken languages, previous history of dementia, etc.); responses will be associated with the appropriate participant ID. If consent is provided by an alternate decision-maker, the participant’s data will be collected from the designated proxy. This information will be used to control for confounding variables when conducting analyses of the collected data and will only be reported anonymously or in aggregate.

### *Data availability*

Since we will collect highly sensitive data, only processed data can be shared with third-party institutions and the collected data will not be made publicly available.

### *Acceptability evaluation*

All participants will be asked to answer a questionnaire (*copy under supplementary file*) on the acceptance of the videoconference as well as of the face-to-face modality for cognitive testing including 7 questions with a response ranging from 1 to 7, where 1=I strongly disagree and 7=I

1  
2  
3 strongly agree. This questionnaire is based on the ‘System Usability Scale’<sup>31</sup> and assesses  
4 the user experience, including an overall evaluation, participant satisfaction, if they would  
5 repeat the experience, attitudes, and clarity of instructions as well as what type of method is  
6 preferred and why . After each question, participants have the option to add a comment.  
7  
8 The three following open questions are included at the end of the questionnaire: What was  
9  
10 missing or disappointing in your experience? What do you like most/least about this procedure?  
11  
12 What is the one thing we could do to make it better?  
13  
14  
15

16 Descriptive statistics will be performed on the obtained scores. Qualitative analysis will be  
17 applied to the comments and written answers to the questionnaires as well as on feedback  
18 provided during informal focus group discussions with participants to define encountered  
19 problems and points of improvement of the system.  
20  
21  
22  
23  
24  
25  
26

### 27 *Speech data*

28 The speech of the different participants will be recorded as audio files for different cognitive  
29 tests. Depending on the test, the recorded speech will be either free speech or direct answers to  
30 questions, or verbal or visual stimuli.  
31  
32

33 We will directly record the speech of the patients. From the audio files, we will use automatic  
34 speech recognition (ASR) to obtain textual transcripts of the recordings. A subset of the data  
35 will be manually transcribed to compare results between automated and manual transcriptions.  
36  
37 We will use either the internal microphone of the device (PC or tablet) or an external  
38 microphone for better recording quality. The recorded data will be automatically stored on the  
39 secured server.  
40  
41  
42  
43  
44  
45

### 46 *Video data*

47 Towards our general goal to detect and remotely monitor cognitive decline in the context of  
48 dementia in a partially automated way, we intend to support the proposed speech analysis by a  
49 complementary computer-vision based analysis. Such analysis exploits advanced methods  
50 related to automated face analysis, tracking, detection, and recognition, as well as human  
51 behavior analysis.  
52  
53  
54  
55  
56  
57

58 Firstly, we plan to record 2D video data from all participants for the computer vision-based  
59 analysis. Then, we intend to analyze this data with a focus on finding facial/gestural behaviors  
60

1  
2  
3 and facial/gestural activities that are representative for cognitive performance and  
4 neuropsychiatric symptoms of dementia in different situations, such as free speech interviews,  
5 and in some cognitive tests (e.g., patients are encouraged to describe the content of a series of  
6 images).  
7  
8  
9

10  
11 We intend to acquire the video data using the integrated web camera of the device (PC or  
12 Tablet) used for the telemedicine session. Possible use of an external web camera connected to  
13 a PC is also considered. In both cases, the recorded data will be automatically stored on the  
14 secured server.  
15  
16  
17  
18

### 19 *Stress measure data*

20 We would like to explore the use of additional objective markers of stress levels within this  
21 study. For this, for only a subgroup of participants (during the mobile home unit phase), we  
22 will extract through the Empatica E4 device physiological data during both administration  
23 methods:  
24  
25  
26  
27  
28

- 29 ● Electro-Dermal Activity (EDA): measures sympathetic nervous system activity  
30 manifested through the skin, by measuring the constantly fluctuating changes in certain  
31 electrical properties of the skin;
- 32 ● Heart Rate Variability (HRV): derived from measuring Blood Volume Pulse (BVP);
- 33 ● Peripheral Skin temperature: measured using an integrated Infrared Thermopile;
- 34 ● 3-axis Accelerometer: captures motion-based activity, which identifies intensity and  
35 frequency of movements that could be a seizure.  
36  
37  
38  
39  
40  
41  
42

43 We aim to compare the different time point measures with each other to assess the stress levels  
44 of the participants during the face-to-face and the remote assessment administration.  
45  
46  
47  
48  
49  
50  
51  
52  
53  
54  
55  
56  
57  
58  
59  
60



### *Data security*

A collection of data will be made with the videoconferencing web-based platform (telemedicine tool). Digital data (audio, video, recorded scores, answers to questionnaires), as well as written records will be collected.

Concerning the paper data, these will be stored in armoires with access limited to clinicians participating in the study (a key is needed for access). Each involved clinical partner will store these papers in their clinic. The data will be digitized through the web-platform to conduct the research work. In the following paragraphs, we provide details about the security of all digital data.

To perform the study, a secured connection to the web-platform is required by both clinicians and participant subjects. The secured and encrypted connection (i.e., HTTPS) requires authentication with an email address and an encrypted password. Only limited email addresses' domains will be allowed to connect to the web-platform. The clinician should have a professional email that is provided by their organization (such as "@chu-nice.fr", "@ch-digne.fr" ...). Only the domains of clinical partners involved in the clinical study will be allowed.

The enrolled subjects will have authorized access to the web-platform with their email and a generated temporary password valid only for the time of their participation in the study. The password will be entered by the person accompanying the subject (a clinician, part of the clinical study) to connect the subject to the platform. For the subjects who have no email, a unique identifier (temporary email) will be provided.

The data collected during the study will be stored in a secured encrypted database. The database will be hosted by the Institute Claude Pompidou (ICP) servers. These servers are owned and part of the University Hospital of Nice (CHU NICE). These servers are secure and follow all the required security and healthcare data hosting regulations. The security of the servers is managed by the IT personnel of CHU NICE.

An IT technician from the ICP will maintain the database. The technician will have all the rights on the database:

- Create/delete/edit the list of clinicians who can access the web-platform.

- Create/delete/edit the list of subjects participating in the clinical study.

The authorized clinicians will have the right to access to the web-interface, which will allow them to perform the study. The collected data will automatically be stored in the database.

Access to the stored data is strictly reserved to the clinicians with a secured account. The type of database is MySQL Database. The security of the database is ensured by AES (Advanced Encryption Standard) techniques. The following rules will be applied:

- the database will only be accessible from trusted hosts,
- no use of data from input without filtering,
- all types of data will be protected,
- the administrator of the database will not be a user (the IT technician) of the web platform.

Security of transmission between clinicians and participants during study sessions: After the clinician and the participant are connected to the platform, video streams are circulating in both directions. Video stream are protected by integrating the following rules:

- The sessions of the clinical study will be scheduled by the involved clinicians and will not be publicly known.
- We will add a signaling protocol that will provide encryption of signaling traffic.
- The connection between the clinician and the patient will be a P2P connection, the media contents (audio and video channels) will be transmitted between peers directly in full duplex. Thus, as the signaling server maintains the number of peers in communication, we will monitor the connection for additional suspicious peers in a call session. If the number of peers actually present on signaling server is more than the number of peers interacting on the connection, then it could mean that someone is eavesdropping secretly and should be terminated from session access by force.
- Request permission from both sides to use the camera and the microphone.

The dissemination of the research results will be based on the analysis of generated pseudo-anonymous data, which doesn't include any information that would allow any reference to the identity of participants.

### *Data processing*

The collected data will be processed to generate pseudo-anonymous metadata, which will be used by the different technical and clinical partners of the project. These technical partners (who are not the clinicians involved in passing the tests and authorized to access the participant data) will never have access to the raw data: identity of the patient, personnel information, videos and audio or any other information which allows identifying the subject. The only processed data will be: scores of tests, videos and audio files. The processing will be done on the servers of the Institut Claude Pompidou, a processing which will generate anonymous metadata which will be transmitted by the IT technician to the partners with no information about the identity of the participants.

Concretely, an IT technician (or engineer) working for the Institut Claude Pompidou, and authorized to access all patient's data as part of his duties (creating patients records, correcting information about patient information, etc.) will be the only non-clinical person who can access the identifying data of the participants (speech and video recordings). This IT technician will be trained by the technical partners (using similar non-confidential data that does not belong to the participants), for training on relevant software -provided by the technical partners-to generate pseudo-anonymous metadata: low-level features extracted from speech and video such as signal intensities, acoustic characteristics, 2D points positions, and head/eyes positions in different images. This pseudo-anonymized metadata will not contain the identity of the participants. For each participant, a random code will be assigned, known only by the IT technician and the clinicians involved in the study. All the metadata extracted by the different software and executed only by the IT technician will then be transmitted in a pseudo-anonymous manner: the technical partners will not know the identity of the participants, and they will only have access to a set of metadata matched to an unidentifiable code.

In order to perform the processing of the data, other pseudo-anonymous data could be transmitted to the technical partners such as tests' scores and values of different clinical scales.

The data will be stored for a maximum period of 3 years. This time period will allow us to do the research work, analyze the data and publish results .

### *Analysis*

In this study, we will mainly work on the analysis of three types of data: speech, video and tests scores, including multimodal analysis combining the three data types.

To verify the agreement between both administration procedures, we will compare the face-to-face test results with the videoconference-based test results. For this, the mean and standard deviations for each test score will be calculated. Intraclass correlation coefficients will be used to assess agreement between the two testing formats. The ANOVA test will be used to assess if the administration modality (independent variable) was associated with any difference in total scores of the different tests (dependent variables).

### *Speech analysis*

The audio and transcribed text data will be processed to obtain acoustic, lexico-syntactic, and semantic features. First, acoustic features will be extracted from the audio samples. The audio data will be passed through frequency domain transformations to obtain standard acoustic measures used in language processing, such as Mel frequency cepstral coefficients (MFCCs) based on the cepstral representation of the acoustic signal which detects periodicity in its spectrum, jitter, and shimmer measures based on irregularities in signal periodicity, recurrence period density entropy (RPDE) and pitch period entropy (PPE) based on measures of aperiodicity and noise in the signal, measures based on the frequency domain harmonics, signal to noise ratios, and filled and unfilled pause features, among others. Similar work was previously performed for the detection of signs of apathy<sup>26</sup>.

Second, syntactic measures will be obtained from transcriptions of the verbal and written responses. The text transcripts will be parsed with a standard probabilistic context-free grammar parser, and the resulting parse trees will be searched for the presence of specific syntactic constructions. Extracted syntactic features include the depth of syntactic parse trees, use of subordinate and coordinate clauses, use of passive voice, use of different types of syntactic constructions (e.g., noun phrases, auxiliary verb phrases, etc.), and mean length of utterance, among others. Lexical features will be extracted from part of speech tagged transcriptions and written responses; these include relative word-class usage, lexical richness evaluated using standard measures such as type-to-token ratio (TTR) and Honoré's statistic, average age of acquisition, familiarity, and imageability, among others.

1  
2  
3  
4  
5 Lastly, semantic features will be extracted from the transcriptions based on the criteria of the  
6 corresponding language task, e.g., qualitative features from the semantic verbal fluency tasks<sup>32-</sup>  
7  
8 <sup>34</sup> or recall and precision-based measures of semantic content units present in a picture  
9 description task<sup>35</sup>. Other relevant acoustic and linguistic features may also be computed.  
10 Standard statistical testing techniques (e.g., t-test, ANOVA) will be used to determine the  
11 significance of any trends, which are detected in the data.  
12  
13  
14  
15  
16  
17

### 18 *Video analysis*

19  
20 For the video analysis, we will first annotate the data in an initial step to find similar video  
21 sequences (e.g., such as depicted patients talking, as well as such showing smiles or neutral  
22 states). From these annotated sequences, features that target behavioral analysis<sup>36-37</sup> will be  
23 extracted. Specifically, we will use algorithms for face detection and then extract dense  
24 trajectories from the video sequence and represent these with facial spatio-temporal features,  
25 which incorporate motion of sampled points in the video sequence. Using the extracted features,  
26 emotions and engagement of the patients will be computed. Combining the features from video  
27 and speech analysis, we will perform an analysis to correlate the emotions expressed by a  
28 patient and their engagement during the cognitive tests with the cognitive disorders they could  
29 be affected with. In particular, the engagement information of a patient during a test will be  
30 used as an indicator of the success and the efficiency of a cognitive test. Our approach will be  
31 validated by the acquired data, as well as by benchmark datasets, which are publicly available.  
32 The recorded data will only be used to develop, test, and validate algorithms (analysis,  
33 classification, deep-learning, etc.) and will be deleted after the study.  
34  
35  
36  
37  
38  
39  
40  
41  
42  
43  
44

### 45 **Ethics, Risks and benefits**

46  
47 The procedures are not invasive and there are no expected risks or burdens to participants. All  
48 participants will be informed that this is an observational study and their consent taken prior to  
49 the experiment. Participants with cognitive impairment may experience feelings of confusion,  
50 anxiety, distress, embarrassment, or sadness during participation. We mitigate against this by  
51 explaining sufficiently beforehand the procedure, answering possible questions and keeping the  
52 session relatively short. In situations where a participant is significantly distressed as a result  
53 of participating in the study, the clinician will stop the session. Participants may withdraw from  
54 the study completely at any time. No other known risks to the participants exist. After  
55  
56  
57  
58  
59  
60

1  
2  
3 completion of the tests, each participant will receive feedback on her/his performance as well  
4 as a summary report will be sent to the referring practitioner.  
5  
6  
7

8 Confidentiality aspects such as data encryption and storage comply with the GDPR and the  
9 requirements from sponsoring bodies and ethical committees. Results from this study will be  
10 published in peer-reviewed journals. However, all communications will only include results on  
11 analyses undertaken after pre-processing the recordings, ensuring that audio-visual data will  
12 never be published or disseminated.  
13  
14  
15  
16  
17

18 The project will enable the validation of technology that allows the implementation of  
19 sophisticated and unobtrusive remote neuropsychological assessment, eventually at home or at  
20 easily reachable locations to facilitate access to clinical experts. The solution will furthermore  
21 allow for easier recruitment and onboarding of people living isolated in rural areas into clinical  
22 trials who, are until today, underrepresented due to the lack of access to clinical sites.  
23  
24  
25  
26  
27

## 28 **Conclusions**

29 Demonstration of the effectiveness of this technology may later make it possible to diffuse its  
30 use across all rural areas ('medical deserts') in France and thus improve the early diagnosis of  
31 neurodegenerative pathologies while providing data crucial for basic research. Ultimately, it  
32 will lead to an improvement of health care access and care of isolated seniors in these regions.  
33 Furthermore, recruitment, onboarding, and monitoring of potential candidates in these regions  
34 for clinical trials will be facilitated. Pushing the use of such remote solutions in the future is of  
35 particular relevance given the current context of the COVID19 pandemic.  
36  
37  
38  
39  
40  
41  
42  
43

## 44 **Acknowledgements**

45 This research is funded by the EIT Health Activity 19249, DeepSPA, with great support from  
46 Modis Belgium, Janssen Clinical Innovation, the Association IA, ADMR 04, and the Centre  
47 Hospitalier and the city of Digne-les-bains, France. Special thanks to Valérie DEPRAD  
48 President, Francis Kuhn and Emmanuelle Martin Vice-President of ADMR 04.  
49  
50  
51  
52  
53

## 54 **Contributorship statement**

55 Conceptualization, A.K., R.Z., RG, K.L., I.R., P.R.; methodology, R.Z., A.K., I.R.; software,  
56 R.G., M.D.T., F.B.; validation, R.Z., A.K., P.L., V.B.; formal analysis, N.L., H.L., R.Z.;  
57 investigation, R.Z., A.K., P.L., V.B., resources, P.R. P.L., V.B.; data curation, R.G., F.B.,  
58  
59  
60

1  
2  
3 M.D.T.; writing—original draft preparation, A.K., R.Z., R.G; visualization, R.Z., R.G.;  
4 supervision, P.R., F.B.; project administration, A.K., F.B; funding acquisition, F.B., P.R. All  
5 authors have read and agreed to the published version of the manuscript.  
6  
7  
8  
9

### 10 **Competing interest statement**

11 We have read and understood BMJ policy on declaration of interests. Nicklas Linz is an  
12 employee and shareholder of ki elements UG.  
13  
14  
15  
16

### 17 **Funding Statement**

18 This work is supported by the European Institute for Innovation and Technology (EIT) –  
19 Health, grant number 19249.  
20  
21  
22  
23  
24

### 25 **References**

- 26  
27 1. Armitage R, Nellums LB. COVID-19 and the consequences of isolating the elderly.  
28 Lancet Public Health. 2020 May;5(5):e256. doi: 10.1016/S2468-2667(20)30061-X.  
29 Epub 2020 Mar 20. PMID: 32199471; PMCID: PMC7104160.  
30  
31
- 32 2. Rakesh G, Szabo ST, Alexopoulos GS, Zannas AS. Strategies for dementia prevention:  
33 latest evidence and implications. Ther Adv Chronic Dis. 2017;8(8-9):121-136.  
34 doi:10.1177/2040622317712442  
35  
36
- 37 3. Robert, PH, Konig, A, Andrieu, S, Bremond, F, Chemin, I, Chung, PC, Dartigues, JF,  
38 Dubois, B, Feutren, G, Guillemaud, R, Kenisberg, PA, Nave, S, Vellas, B, Verhey, F,  
39 Yesavage, J, and Mallea, P, Recommendations for ICT Use in Alzheimer's Disease  
40 Assessment: Monaco CTAD Expert Meeting. J Nutr Health Aging, 2013. 17(8): p. 653-  
41 60  
42  
43  
44  
45
- 46 4. Kim H, Jhoo JH, Jang J. The effect of telemedicine on cognitive decline in patients with  
47 dementia. J Telemed Telecare 2017 Jan;23(1):149-154.  
48  
49
- 50 5. Timpano F, Pirrotta F, Bonanno L, et al: Videoconference-based mini mental state  
51 examination: a validation study. Telemed J E Health 2013; 19:931–937  
52  
53
- 54 6. Haralambous, B, Subramaniam, S, Hwang, K, Dow, B, LoGiudice, D. A narrative  
55 review of the evidence regarding the use of telemedicine to deliver video-interpreting  
56 during dementia assessments for older people. Asia-Pacific  
57 Psychiatry. 2019; 11:e12355. <https://doi.org/10.1111/appy.12355>  
58  
59  
60

- 1  
2  
3 7. Barth, J., Nickel, F., & Kolominsky-Rabas, P.L. (2018). Diagnosis of cognitive decline  
4 and dementia in rural areas - A scoping review. *International journal of geriatric*  
5 *psychiatry*, 33 3, 459-474 .  
6  
7
- 8 8. Brearly, T.W., Shura, R.D., Martindale, S.L., Lazowski, R.A., Luxton, D.D., Shenal,  
9 B.V., & Rowland, J.A. (2017). Neuropsychological Test Administration by  
10 Videoconference: A Systematic Review and Meta-Analysis. *Neuropsychology Review*,  
11 27, 174-186.  
12  
13
- 14 9. Dario C, Luisotto E, Dal Pozzo E, et al. Assessment of Patients' Perception of  
15 Telemedicine Services Using the Service User Technology Acceptability  
16 Questionnaire. *Int J Integr Care*. 2016;16(2):13. Published 2016 Jun 1.  
17 doi:10.5334/ijic.2219  
18  
19
- 20 10. Cummins, N, Scherer, S, Krajewski, J, Schnieder, S, Epps, J and Quatieri, T. A review  
21 of depression and suicide risk assessment using speech analysis. *Speech*  
22 *Communication*, vol. 17, pp. 10–49, 2015.  
23  
24
- 25 11. Valstar, M & Pantic, M & Gratch, Jonathan & Schuller, Björn & Ringeval, Fabien &  
26 Lalanne, Denis & Torres Torres, Mercedes & Scherer, Stefan & Stratou, Giota &  
27 Cowie, Roddy. (2016). AVEC 2016: Depression, Mood, and Emotion Recognition  
28 Workshop and Challenge. 3-10. 10.1145/2988257.2988258.  
29  
30
- 31 12. Dewan, M.A.A., Murshed, M. & Lin, F. Engagement detection in online learning: a  
32 review. *Smart Learn. Environ*. 6, 1 (2019). <https://doi.org/10.1186/s40561-018-0080-z>  
33  
34
- 35 13. Asteriadis, S., Karpouzis, K., & Kollias, S. (2011). The Importance of Eye Gaze and  
36 Head Pose to Estimating Levels of Attention The importance of Eye Gaze and Head  
37 Pose to estimating levels of Attention, (June). [https://doi.org/10.1109/VS-](https://doi.org/10.1109/VS-GAMES.2011.38)  
38 [GAMES.2011.38](https://doi.org/10.1109/VS-GAMES.2011.38)  
39  
40
- 41 14. Scherer, S., Stratou, G., Lucas, G., Mahmoud, M., Boberg, J., Gratch, J., Rizzo, A., &  
42 Morency, L. (2014). Automatic audiovisual behavior descriptors for psychological  
43 disorder analysis. *Image Vis. Comput.*, 32, 648-658.  
44  
45
- 46 15. Armaignac DL, Saxena A, Rubens M, et al. Impact of Telemedicine on Mortality,  
47 Length of Stay, and Cost Among Patients in Progressive Care Units: Experience From  
48 a Large Healthcare System. *Crit Care Med*. 2018;46(5):728-735.  
49 doi:10.1097/CCM.0000000000002994  
50  
51
- 52 16. URL : <https://www.empatica.com/en-eu/research/e4/>  
53  
54
- 55 17. Aalten P, Ramakers IH, Biessels GJ, de Deyn PP, Koek HL, OldeRikkert MG, Oleksik  
56 AM, Richard E, Smits LL, van Swieten JC, Teune LK, van der Lugt A, Barkhof F,  
57  
58  
59  
60



- 1  
2  
3 Teunissen CE, Rozendaal N, Verhey FR, van der Flier WM. The Dutch Parelsnoer  
4 Institute--Neurodegenerative diseases; methods, design and baseline results. *BMC*  
5 *Neurol.* 2014 Dec 31;14:254. doi: 10.1186/s12883-014-0254-4. PMID: 25551191;  
6  
7  
8  
9  
10  
11  
12  
13  
14  
15  
16  
17  
18  
19  
20  
21  
22  
23  
24  
25  
26  
27  
28  
29  
30  
31  
32  
33  
34  
35  
36  
37  
38  
39  
40  
41  
42  
43  
44  
45  
46  
47  
48  
49  
50  
51  
52  
53  
54  
55  
56  
57  
58  
59  
60
18. Almeida OP, Almeida SA: Short versions of the geriatric depression scale: a study of their validity for the diagnosis of a major depressive episode according to ICD-10 and DSM-IV. *Int J Geriatr Psychiatry* 1999, 14(10):858–865.
19. Robert PH, Clairet S, Benoit M, Koutaich J, Bertogliati C, Tible O, Caci H, Borg M, Brocker P, Bedoucha P. The apathy inventory: assessment of apathy and awareness in Alzheimer's disease, Parkinson's disease and mild cognitive impairment. *Int J Geriatr Psychiatry*. 2002 Dec;17(12):1099-105. doi: 10.1002/gps.755. PMID: 12461757.
20. Folstein MF, Folstein SE, McHugh PR: "Mini-mental state". A practical method for grading the cognitive state of patients for the clinician. *J Psychiatr Res* 1975, 12(3):189–198.
21. Grober E, Merling A, Heimlich T, Lipton RB. Free and cued selective reminding and selective reminding in the elderly. *J Clin Exp Neuropsychol.* 1997 Oct;19(5):643-54. doi: 10.1080/01688639708403750. PMID: 9408795.
22. Dubois, B, Touchon, J, Portet, F, Ousset, P, Vellas, B, Michel, B (2002). The "5 words": A simple and sensitive test for the diagnosis of Alzheimer's disease. *Presse médicale* (Paris, France : 1983). 31. 1696-9.
23. Peigneux P, Van der Linden, M (2000) « Présentation d'une batterie neuropsychologique et cognitive pour l'évaluation de l'apraxie gestuelle », *Revue de neuropsychologie*, vol. 10, n° 2, 2000, p. 311-362
24. Baddeley A. D., Emslie H., & Nimmo-Smith I. (1994). *The Doors and People Test: A test of visual and verbal recall and recognition*. Bury-St-Edmunds, UK: Thames Valley Test Company.
25. Botwinick, J., & Storandt, M. (1974). *Memory, related functions and age*. Springfield, IL: Thomas.
26. König A, Linz N, Zeghari R, Klinge X, Tröger J, Alexandersson J, Robert P. Detecting Apathy in Older Adults with Cognitive Disorders Using Automatic Speech Analysis. *J Alzheimers Dis.* 2019;69(4):1183-1193.
27. Godefroy O, Gibbons L, Diouf M, Nyenhuis D, Roussel M, Black S, Bugnicourt JM; GREFEX study group. Validation of an integrated method for determining cognitive ability: Implications for routine assessments and clinical trials. *Cortex.* 2014

- 1  
2  
3 May;54:51-62. doi: 10.1016/j.cortex.2014.01.016. Epub 2014 Feb 7. PMID: 24632464;  
4  
5 PMCID: PMC4737650.
- 6  
7 28. Harold Goodglass, Edith Kaplan, and Barbara Barresi. 2000. Boston Diagnostic  
8 Aphasia Examination. Lippincott Williams & Wilkins.
- 9  
10 29. De Partz, MP, Bilocq, V, De Wilde V., Seron, X, Pillon A. (2001). LEXIS, Test pour le  
11 diagnostic des troubles lexicaux chez le patient aphasique. Marseille : Solal.
- 12  
13 30. Deloche, G, Hannequin, D. (1997). Test de Dénomination Orale d'Images. Paris : les  
14 Éditions du Centre de Psychologie Appliquée
- 15  
16 31. Brooke, J. (1996). SUS: A “quick and dirty” usability scale. In P. W. Jordan, B. Thomas,  
17 B. A. Weerdmeester, & I. L. McClelland (Eds.), Usability evaluation in industry (pp.  
18 189–194). London: Taylor & Francis.
- 19  
20 32. König A, Linz N, Tröger J, Wolters M, Alexandersson J, Robert P, Fully Automatic  
21 Speech-Based Analysis of the Semantic Verbal Fluency Task. *Dement Geriatr Cogn*  
22 *Disord* 2018; 45(3-4):198-209
- 23  
24 33. Linz, N, Tröger J, Alexandersson, J, Wolters, M., König, A. Robert, PH. Predicting  
25 Dementia Screening and Staging Scores From Semantic Verbal Fluency Performance.  
26 In proceedings of the IEEE International Conference on Data Mining (ICDM) -  
27 Workshop on Data Mining for Aging, Rehabilitation and Independent Assisted Living,  
28 18-21 November 2017 New Orleans, USA.
- 29  
30 34. Linz, N, Tröger J, Alexandersson, J, König, A. Using Neural Word Embeddings in the  
31 Analysis of the Clinical Semantic Verbal Fluency Task. In Proceedings of the 12th  
32 International Conference on Computational Semantics (IWCS), 19-22 September 2017  
33 Montpellier (France)
- 34  
35 35. Fraser, K, Meltzer, J, Rudzicz, F. (2015). Linguistic Features Identify Alzheimer's  
36 Disease in Narrative Speech. *Journal of Alzheimer's disease : JAD*. 49. 10.3233/JAD-  
37 150520.
- 38  
39 36. J.F. Cohn, T.S. Kruez, I. Matthews, Y. Ying, M.H. Nguyen, M.T. Padilla, F. Zhou, F.  
40 De la Torre, Detecting depression from facial actions and vocal prosody, 3rd  
41 International Conference on Affective Computing and Intelligent Interaction and  
42 Workshops, 2009, pp. 1–7.
- 43  
44 37. J. Joshi, R. Goecke, G. Parker, M. Breakspear, Can body expressions contribute to  
45 automatic depression analysis? *Proceedings of IEEE Conference on Automatic Face*  
46 *and Gesture Recognition*, 2013.
- 47  
48  
49  
50  
51  
52  
53  
54  
55  
56  
57  
58  
59  
60

1  
2  
3  
4  
5  
6  
7  
8  
9  
10  
11  
12  
13  
14  
15  
16  
17  
18  
19  
20  
21  
22  
23  
24  
25  
26  
27  
28  
29  
30  
31  
32  
33  
34  
35  
36  
37  
38  
39  
40  
41  
42  
43  
44  
45  
46  
47  
48  
49  
50  
51  
52  
53  
54  
55  
56  
57  
58  
59  
60

For peer review only

1  
2  
3  
4  
5  
6  
7  
8  
9  
10  
11  
12  
13  
14  
15  
16  
17  
18  
19  
20  
21  
22  
23  
24  
25  
26  
27  
28  
29  
30  
31  
32  
33  
34  
35  
36  
37  
38  
39  
40  
41  
42  
43  
44  
45  
46  
47  
48  
49  
50  
51  
52  
53  
54  
55  
56  
57  
58  
59  
60

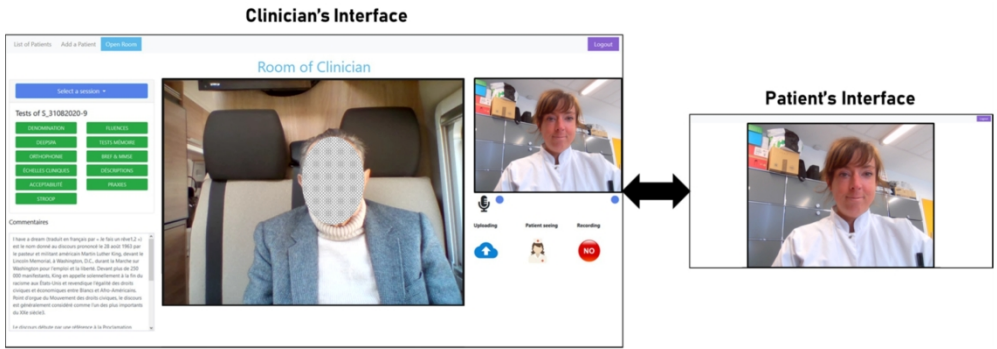

Clinician and Patient interfaces of the videoconference tool

1253x443mm (72 x 72 DPI)



Study protocol design

329x176mm (150 x 150 DPI)

**User Experience assessment:**

Questionnaire on acceptance of the remote modality for cognitive testing

1. Overall, I am satisfied with the experience.

Strongly disagree

Strongly agree

|   |   |   |   |   |   |   |
|---|---|---|---|---|---|---|
| 1 | 2 | 3 | 4 | 5 | 6 | 7 |
|---|---|---|---|---|---|---|

Comment:

---



---



---

2. Overall, the system is easy to use.

Strongly disagree

Strongly agree

|   |   |   |   |   |   |   |
|---|---|---|---|---|---|---|
| 1 | 2 | 3 | 4 | 5 | 6 | 7 |
|---|---|---|---|---|---|---|

Comment:

---



---



---

3. The Instructions were clear and understandable

Strongly disagree

Strongly agree

|   |   |   |   |   |   |   |
|---|---|---|---|---|---|---|
| 1 | 2 | 3 | 4 | 5 | 6 | 7 |
|---|---|---|---|---|---|---|

Comment:

---



---



---

4. I would repeat the experience

Strongly disagree

Strongly agree

|   |   |   |   |   |   |   |
|---|---|---|---|---|---|---|
| 1 | 2 | 3 | 4 | 5 | 6 | 7 |
|---|---|---|---|---|---|---|

Comment:

---



---



---

- 1  
2  
3 5. Have you considered withdrawing from the study/experience at any time? Check  
4 your answer.  
5  
6  
7

|     |    |
|-----|----|
| YES | NO |
|-----|----|

8  
9 Comment:

10  
11  
12  
13  
14

---



---



---

- 15  
16  
17 6. Which evaluation method do you prefer, face-to-face or (phone) video-conferencing?  
18 Check your answer.  
19

|              |                        |
|--------------|------------------------|
| face-to-face | video-conference/phone |
|--------------|------------------------|

- 20  
21  
22  
23  
24 7. On a scale of zero to ten, how likely are you to recommend this method of evaluation  
25 to a friend or colleague?  
26

27  
28 Strongly  
29 disagree

Strongly agree

|   |   |   |   |   |   |   |   |   |    |
|---|---|---|---|---|---|---|---|---|----|
| 1 | 2 | 3 | 4 | 5 | 6 | 7 | 8 | 9 | 10 |
|---|---|---|---|---|---|---|---|---|----|

30  
31  
32  
33  
34  
35 What was missing or disappointing in your experience?  
36

37  
38

---



---

39  
40 What do you like most/least about this procedure?  
41

42  
43

---



---

44  
45 What is the one thing we could do to make it better?  
46

47  
48

---



---

# BMJ Open

## Remote Cognitive Assessment of Older Adults in Rural Areas by Telemedicine and Automatic Speech & Video Analysis: protocol for a cross-over feasibility study

|                                 |                                                                                                                                                                                                                                                                                                                                                                                                                                                                                                                                                                                                                                                                                                                                                                                                                                                                                                                                                                                                                                                                                                                                                                                                                                                                                                                                                                                                                                    |
|---------------------------------|------------------------------------------------------------------------------------------------------------------------------------------------------------------------------------------------------------------------------------------------------------------------------------------------------------------------------------------------------------------------------------------------------------------------------------------------------------------------------------------------------------------------------------------------------------------------------------------------------------------------------------------------------------------------------------------------------------------------------------------------------------------------------------------------------------------------------------------------------------------------------------------------------------------------------------------------------------------------------------------------------------------------------------------------------------------------------------------------------------------------------------------------------------------------------------------------------------------------------------------------------------------------------------------------------------------------------------------------------------------------------------------------------------------------------------|
| Journal:                        | <i>BMJ Open</i>                                                                                                                                                                                                                                                                                                                                                                                                                                                                                                                                                                                                                                                                                                                                                                                                                                                                                                                                                                                                                                                                                                                                                                                                                                                                                                                                                                                                                    |
| Manuscript ID                   | bmjopen-2020-047083.R2                                                                                                                                                                                                                                                                                                                                                                                                                                                                                                                                                                                                                                                                                                                                                                                                                                                                                                                                                                                                                                                                                                                                                                                                                                                                                                                                                                                                             |
| Article Type:                   | Protocol                                                                                                                                                                                                                                                                                                                                                                                                                                                                                                                                                                                                                                                                                                                                                                                                                                                                                                                                                                                                                                                                                                                                                                                                                                                                                                                                                                                                                           |
| Date Submitted by the Author:   | 22-Jul-2021                                                                                                                                                                                                                                                                                                                                                                                                                                                                                                                                                                                                                                                                                                                                                                                                                                                                                                                                                                                                                                                                                                                                                                                                                                                                                                                                                                                                                        |
| Complete List of Authors:       | <p>König, Alexandra; Institut National de Recherche en Informatique et en Automatique Centre de Recherche Sophia Antipolis Méditerranée, STARS Team; Université Côte d'Azur, Cobtek (Cognition-Behaviour-Technology) Lab, FRIS</p> <p>Zeghari, Radia; Université Côte d'Azur, Cobtek (Cognition-Behaviour-Technology) Lab, FRIS</p> <p>Guerchouche, Rachid; Institut National de Recherche en Informatique et en Automatique Centre de Recherche Sophia Antipolis Méditerranée, STARS Team; Université Côte d'Azur, Cobtek (Cognition-Behaviour-Technology) Lab, FRIS</p> <p>Duc Tran, Minh; Institut National de Recherche en Informatique et en Automatique Centre de Recherche Sophia Antipolis Méditerranée, STARS team</p> <p>Bremond, François; Institut National de Recherche en Informatique et en Automatique Centre de Recherche Sophia Antipolis Méditerranée, STARS Team</p> <p>Linz, Nicklas; German Research Centre for Artificial Intelligence Saarbrücken Branch</p> <p>Lindsay, Hali; Deutsches Forschungszentrum für Künstliche Intelligenz GmbH Standort Saarbrücken</p> <p>Langel, Kai; Janssen Healthcare Innovation</p> <p>Ramakers, I.H.G.B; Maastricht University</p> <p>Lemoine, Pascale; Centre Hospitalier de Digne-les-Bains</p> <p>Bultingaire, Vincent; Centre Hospitalier de Digne-les-Bains</p> <p>Robert, Philippe; Université Côte d'Azur, Cobtek (Cognition-Behaviour-Technology) Lab, FRIS</p> |
| <b>Primary Subject Heading</b>: | Mental health                                                                                                                                                                                                                                                                                                                                                                                                                                                                                                                                                                                                                                                                                                                                                                                                                                                                                                                                                                                                                                                                                                                                                                                                                                                                                                                                                                                                                      |
| Secondary Subject Heading:      | Geriatric medicine, Health services research, Neurology                                                                                                                                                                                                                                                                                                                                                                                                                                                                                                                                                                                                                                                                                                                                                                                                                                                                                                                                                                                                                                                                                                                                                                                                                                                                                                                                                                            |
| Keywords:                       | Telemedicine < BIOTECHNOLOGY & BIOINFORMATICS, Dementia < NEUROLOGY, Old age psychiatry < PSYCHIATRY, Health informatics < BIOTECHNOLOGY & BIOINFORMATICS, Clinical trials < THERAPEUTICS                                                                                                                                                                                                                                                                                                                                                                                                                                                                                                                                                                                                                                                                                                                                                                                                                                                                                                                                                                                                                                                                                                                                                                                                                                          |
|                                 |                                                                                                                                                                                                                                                                                                                                                                                                                                                                                                                                                                                                                                                                                                                                                                                                                                                                                                                                                                                                                                                                                                                                                                                                                                                                                                                                                                                                                                    |



1  
2  
3  
4  
5  
6  
7  
8  
9  
10  
11  
12  
13  
14  
15  
16  
17  
18  
19  
20  
21  
22  
23  
24  
25  
26  
27  
28  
29  
30  
31  
32  
33  
34  
35  
36  
37  
38  
39  
40  
41  
42  
43  
44  
45  
46  
47  
48  
49  
50  
51  
52  
53  
54  
55  
56  
57  
58  
59  
60

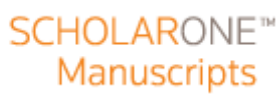



I, the Submitting Author has the right to grant and does grant on behalf of all authors of the Work (as defined in the below author licence), an exclusive licence and/or a non-exclusive licence for contributions from authors who are: i) UK Crown employees; ii) where BMJ has agreed a CC-BY licence shall apply, and/or iii) in accordance with the terms applicable for US Federal Government officers or employees acting as part of their official duties; on a worldwide, perpetual, irrevocable, royalty-free basis to BMJ Publishing Group Ltd ("BMJ") its licensees and where the relevant Journal is co-owned by BMJ to the co-owners of the Journal, to publish the Work in this journal and any other BMJ products and to exploit all rights, as set out in our [licence](#).

The Submitting Author accepts and understands that any supply made under these terms is made by BMJ to the Submitting Author unless you are acting as an employee on behalf of your employer or a postgraduate student of an affiliated institution which is paying any applicable article publishing charge ("APC") for Open Access articles. Where the Submitting Author wishes to make the Work available on an Open Access basis (and intends to pay the relevant APC), the terms of reuse of such Open Access shall be governed by a Creative Commons licence – details of these licences and which [Creative Commons](#) licence will apply to this Work are set out in our licence referred to above.

Other than as permitted in any relevant BMJ Author's Self Archiving Policies, I confirm this Work has not been accepted for publication elsewhere, is not being considered for publication elsewhere and does not duplicate material already published. I confirm all authors consent to publication of this Work and authorise the granting of this licence.

1  
2  
3  
4  
5 **Remote Cognitive Assessment of Older Adults in Rural Areas by**  
6 **Telemedicine and Automatic Speech & Video Analysis: protocol for a**  
7 **cross-over feasibility study**  
8  
9  
10  
11  
12

13 Authors:

14 *Alexandra König<sup>1,2</sup>, Radia Zeghari<sup>2</sup>, Rachid Guerchouche<sup>1,2</sup>, Minh Duc Tran<sup>1</sup>, François*  
15 *Bremond<sup>1</sup>, Nicklas Linz<sup>3</sup>, Hali Lindsay<sup>4</sup>, Kai Langel<sup>5</sup>, Inez. H.G. B. Ramakers<sup>6</sup>, Pascale*  
16 *Lemoine<sup>7</sup>, Vincent Bultingaire<sup>7</sup> and Philippe Robert<sup>2,8</sup>*  
17  
18  
19  
20

- 21 1 Institut national de recherche en informatique et en automatique (INRIA), Stars Team,  
22 Sophia Antipolis, France  
23  
24 2 Cobtek (Cognition-Behaviour-Technology) Lab, FRIS-University Côte d'azur, Nice,  
25 France  
26  
27 3 ki-elements, Saarbrücken, Germany  
28  
29 4 German Research Center for Artificial Intelligence (DFKI), Saarbrücken, Germany  
30  
31 5 Janssen Clinical Innovation, Beerse, Belgium  
32  
33 6 Maastricht University, Netherlands  
34  
35 7 Centre Hospitalier Digne-les-Bains, France  
36  
37 8 Association Innovation Alzheimer, Nice, France  
38  
39  
40  
41

42 Corresponding Author:

43 Alexandra König, PhD

44 Institut national de recherche en informatique et en automatique (INRIA),

45 Stars Team, Sophia Antipolis, France

46 Cobtek (Cognition-Behaviour-Technology) Lab

47 University Côte d'azur

48 Institut Claude Pompidou

49 10 rue Molière,

50 06100, Nice, France

51 Tel. : +33 492 034 760

52 Email : alexandra.konig@inria.fr  
53  
54  
55  
56  
57  
58  
59  
60

**Dates of the study:**

- Data collection: September 2019 - December 2021
- Data analysis and dissemination: from June 2021 - end of resources.
- Ethical approval granted on 09 September 2019 by the 'Comité de protection des personnes EST-III' (Ethical committee board Hospital of Brabois, Vandoeuvre-les-Nancy, France)  
(No National : 2019-A01225-52; No CPP : 19.06.01; Protocol No.19.05.14.48028/4162)

**Data sharing statement:** No additional data are available

## Abstract

**Introduction:** Early detection of cognitive impairments is crucial for the successful implementation of preventive strategies. However, in rural isolated areas or so-called ‘medical deserts’, access to diagnosis and care is very limited. With the current pandemic crisis, now even more than ever, remote solutions such as telemedicine platforms represent great potential and can help to overcome this barrier. Moreover, current advances made in voice and image analysis can help overcome the barrier of physical distance by providing additional information on a patients’ emotional and cognitive state. Therefore, the aim of this study is to evaluate the feasibility and reliability of a videoconference system for remote cognitive testing empowered by automatic speech and video analysis.

**Methods and analysis:** 60 participants (aged 55 and older) with and without cognitive impairment will be recruited. A complete neuropsychological assessment including a short clinical interview will be administered in two conditions, once by telemedicine and once by face-to-face. The order of administration procedure will be counterbalanced so half of the sample starts with the videoconference condition and the other half the face-to-face condition. Acceptability and user experience will be assessed among participants and clinicians in a qualitative and quantitative manner. Speech and video features will be extracted and analyzed to obtain additional information on mood and engagement levels. In a subgroup, measurements of stress indicators such as heart rate and skin conductance will be compared.

**Ethics and dissemination:** The procedures are not invasive and there are no expected risks or burdens to participants. All participants will be informed that this is an observational study and their consent taken prior to the experiment. Demonstration of the effectiveness of such technology makes it possible to diffuse its use across all rural areas (‘medical deserts’) and thus, to improve the early diagnosis of neurodegenerative pathologies, while providing data crucial for basic research. Results from this study will be published in peer-reviewed journals.

*Keywords: telemedicine, telehealth, cognitive assessment, videoconference, neuropsychology, dementia prevention, speech analysis, video analysis, language and image processing*

### Strengths and limitations of this study

- The study aims to evaluate the use of a specifically developed and tailored videoconference system for administering remotely a complete cognitive and psychological assessment
- Additional audio and video features for emotion and engagement detection as well as objective stress measurements will be captured
- A mobile unit will test the use of the system in an equipped van that goes to the participants' home
- The sample size is relatively low since the study is limited in time
- Selection bias may be that only participants open to the use of technology are willing to participate even if usage does not require any real interaction with the system

## Introduction

With the current COVID19 pandemic crisis, now even more than ever, technical solutions such as telemedicine platforms are of great importance to provide isolated elderly people with timely and sufficient access to healthcare. Moreover, in regard to this, the journal 'Lancet' published an article underlining the important negative consequences of social isolation on older adults<sup>1</sup> and that online technologies represent a promising solution to overcome these problems, by providing support and connection to health care professionals.

Today, many barriers, such as social isolation, still often hinder the early diagnosis of cognitive and affective disorders such as dementia which is crucial for timely treatment and management since lately the benefits of prevention strategies have been clearly demonstrated<sup>2</sup>.

For older adults living in rural isolated areas, it is particularly challenging due to the limited access and long travel times to specialized clinics, causing complete exclusion and thus, under-representation of this population in clinical trials.

New methods for remote screening and monitoring of people at risk are sorely needed. Additionally, the increasing risks caused by social isolation among older people in these areas have to be addressed rapidly. For this, over the past years, Information and communication technologies (ICT) have been employed in the field of dementia research with attempts of using computerized cognitive testing, sensors, automatic speech or image analysis for more objective and standardized evaluation of patients cognitive, behavioral and emotional states<sup>3</sup>. Furthermore, several studies have investigated the use of telemedicine for remote cognitive assessments of dementia disorders<sup>4-5</sup>.

The use of videoconference-mediated telemedicine is gradually increasing in diverse patient care settings including primary care, critical care, neurology, behavioral health, and psychiatry, among other specialty areas. Lately, review studies show that a certain number of cognitive tests can be administered remotely with reliable results compared to face-to-face assessment with psychologists at a clinic<sup>6-8</sup>. Acceptability assessments show as well that this form of being assessed is relatively well tolerated by the users<sup>9</sup>.

However, most studies focused on just one or a few cognitive tests using already existing video-conference platforms such as Skype©. Hence, it would be important to evaluate the feasibility of remote administration of a complete neuropsychological assessment including

multiple tests of cognitive functions as well as a typical anamnesis interview. One hypothesis is that clinicians seem hesitant in adopting telemedicine technology due to the feeling of distance to their patients; they report the difficulty of extracting sufficient non-verbal cues on a patients' emotional state via this administration method. Today, with the advances in Artificial Intelligence (AI) empowered speech, language, and image processing, it is possible to extract additional sophisticated and unobtrusive natural biomarkers from the videoconference-based consultations and provide it back to the clinician as feedback for a better understanding of a patients' behavior and differential diagnosis. These sensor-based technologies can provide rich information about cognitive and emotional characteristics, such as, for instance, prosodic features from speech for mood detection<sup>10-11</sup>, or head and eye directions from video for indicating engagement levels<sup>12-13</sup>. This can be used to help with the process of clinical decision-making during consultations, improving diagnostic precision and overcoming the lack of communication cues usually provided in face-to-face interactions. New perceptual analysis, (computer vision algorithms and natural language processing) can add more quantitative information to the interactions such dynamics and intensity of behaviors<sup>14</sup>.

For this, a videoconference system tool was developed (Figure 1.) and specifically designed to remotely perform a full range of neuropsychological tests supporting early detection and monitoring of cognitive disorders. In opposition to already existing videoconference tools, it has two different adapted interfaces, one for the clinician (left image) with several clinical tests implemented and available in a platform with its visual content and scoring system and one very simplified for the patient (right image) showing mainly the clinician or the test content. For each test, speech and video can be recorded.

*Figure 1. Clinician and Patient interfaces of the videoconference tool; on the left side the clinician can access all different tests, control the visual content for the patient, score performances and record speech and video. The interface shows in the center the video of the patient and on the right a feedback video of the clinician. On the right side, the patient's interface which displays mainly in the center the video of the clinician or the test content.*

This tool could allow older adults living in rural areas access to enrollment in future clinical dementia trials and thus, more effective interventions resulting in the reduction of overall costs



1  
2  
3 associated with treatment and rehabilitation <sup>15</sup>. For patients, it could offer the comfort of flexible  
4 usage without physically visiting specialized clinicians.  
5  
6  
7

8 Over the past years, in many of France's rural regions, a crisis of medical 'desertification' can  
9 be witnessed caused by a gradual steady decline in the number of local doctors. The region  
10 around Digne-les-Bains in the southeast of France is one of the most affected areas, urgently  
11 requiring novel solutions to address the lack of access to adequate specialized healthcare.  
12  
13  
14

15  
16 The overall aim of the current study is to evaluate the use of this system for administering  
17 remote cognitive assessments to isolated elderly. For this, a counterbalanced cross-over  
18 feasibility study will be performed in the rural areas in the southeast of France (Digne-les-  
19 Bains). The study will target 1) results from videoconference administration of a complete  
20 neuropsychological assessment will be compared to the classical face-to-face administration,  
21 2) acceptability among the users, patients as clinicians, will be assessed and 3) speech features  
22 as well as information on facial expressions and posture will be additionally extracted and  
23 compared to classical assessment scales. Moreover, these features might help to indicate levels  
24 of engagement, stress, fatigue, or mood states.  
25  
26  
27  
28  
29  
30  
31  
32  
33

## 34 **Methods and analysis**

### 35 *Objectives*

36  
37 We aim to deploy and test a specifically designed videoconference system for cognitive testing  
38 under real conditions of a clinical feasibility study.  
39  
40  
41  
42  
43

- 44 1. Evaluate the new telemedical service in terms of clinical relevance & usability and  
45 acceptability
  - 46 a) Evaluate the reliability of the different cognitive tests administered through the  
47 videoconference system to isolated older adults living in rural areas
  - 48 b) Assess acceptability of videoconference modality among the users  
49 qualitatively and quantitatively
  - 50 c) Identify automatically extracted speech, language, and video features, which  
51 correlate with cognitive performance and neuropsychiatric/psychological  
52 symptoms (e.g., depression, apathy, anxiety), as measured by standard clinical  
53 cognitive and behavioral assessments.  
54  
55  
56  
57  
58  
59  
60

- 1  
2  
3 d) Support the proposed speech analysis by a complementary computer-vision  
4 based analysis. Such analysis exploits advanced methods related to automated  
5 face analysis, tracking, detection and recognition, as well as human behavior  
6 analysis (capturing mood, levels of engagement in tasks and levels of arousal).  
7  
8  
9

### 10 *Participants*

11 For this non-interventional observational study, 60 older adults will be recruited (age  $\geq 55$ )  
12 from the region of Digne-les-Bains, France over an inclusion period of 12 months. Participants  
13 will be referred by the local Hospital Center's memory clinic, general practitioners, and/or the  
14 ADMR (*Aide à domicile en milieu rural*/ Home services in rural areas) Federation. Those  
15 interested in the study, will receive an information sheet. On attendance, a member of the  
16 research team will address any potential queries and take informed consent, prior to the  
17 experiment.  
18  
19  
20  
21  
22  
23

24 Main inclusion criteria are

- 25 • Lives in the region of Digne-les-Bains
- 26 •  $\geq 55$  years old
- 27 • Speaks French as a first language
- 28 • Can independently understand the informed consent form, and voluntarily consents to  
29 participate, OR has an alternate decision maker who can provide consent on their behalf  
30 while the participant provides assent.  
31  
32  
33  
34  
35

36 Exclusion criteria are:

- 37 • Has significant vision problems which would impact ability to perceive visual stimuli
- 38 • Has significant auditory problems which would impact ability to understand verbal  
39 prompts  
40  
41  
42  
43

### 44 *Patient and public involvement*

45 Participants were not directly involved in the development of the protocol and research  
46 questions. However, the association ADMR is working very closely with isolated elderly and  
47 represents an important partner in this project. Its members were involved from the early  
48 beginning of the planning and their input shaped the overall design of the study. Focus groups  
49 with participants will be organized to gather feedback on the experience of the videoconference-  
50 based administration procedure.  
51  
52  
53  
54  
55  
56  
57  
58  
59  
60

### *Study protocol*

To assess the usability of the system in several conditions, we propose two scenarios: the first one is to validate the telemedicine tool in a clinical setup when patients can move to close-by places, where they have access to the needed infrastructures (internet connexion, device with a webcam ...); the second one is to move close-by the homes of isolated patients (e.g., in rural areas) with an equipped mobile unit.

A comprehensive neuropsychological assessment (see Table 1.) consisting of a clinical interview followed by a set of cognitive tests (memory, attention, etc.) will be administered face-to-face and two weeks later remotely via a videoconference system by two different psychologists. The system is installed in a room in the local Hospital Center's memory clinic. To reduce learning effect biases and within rater variability, this procedure will be counterbalanced so that half of the participants first experience the face-to-face interaction and the other half will initially receive the videoconference administration (see Figure 2.).

For the following tests, we will use parallel versions in order to avoid a learning effect: MMSE, Free and Cued Selective Reminding Test, Digit span test, Denomination task, and Semantic and Phonemic fluencies. The study is limited to use the video modality to verify test performances, which makes it complicated for constructional tasks that require drawing. Within the MMSE test, subjects will be asked to perform the task on a white sheet and display it in front of their camera so the clinician can evaluate it remotely.

#### *Figure 2. Study protocol design*

For those participants, who live further away, it is planned to perform the videoconference administration nearby their home with the help of a van equipped with a computer connected to 4G internet. The participants will sit in the van and connect to the psychologist via the system on a dedicated laptop. In this way, the scenario of remotely testing those who are living very isolated will be evaluated.

After the inclusion of all participants, results obtained at the videoconference administration will be compared to the classical face-to-face method to evaluate their reliability. Evaluation reports of the neuropsychological assessments obtained in this study will be sent to the referring clinicians of the hospital in Digne-les-Bains.

Regarding acceptability, participants of the study will be asked to complete a questionnaire on their experience of the videoconference-administered assessment (compared to the classical). In addition a subgroup of study participants, as well as other stakeholders, will be invited to participate in a focus group with semi-structured qualitative interviews in to assess, in more depth, the ease and usability of the system.

A corpus of video and speech samples will be created for further analysis. Features, potentially relevant for early detection of cognitive disorders and/or behavioral and psychological symptoms, will be extracted. Speech, language, and video features extracted during the videoconference administration will be compared partly to manual annotations of the psychologists (information regarding engagement, mood, and arousal), and partly to information extracted during the clinical interview and scales/questionnaires on the presence of behavioral and psychological symptoms (depression, apathy, etc.).

In a subgroup of participants, stress levels will be measured during the face-to-face and remote assessment administration both subjectively via a questionnaire and quantitatively, with a bracelet (Empatica E4<sup>16</sup>) which measures physiological data in real-time.

### **Protocol of the Assessment:**

| Description                                                                                                                                                                                                                                  |
|----------------------------------------------------------------------------------------------------------------------------------------------------------------------------------------------------------------------------------------------|
| 1. Psychologist will call the patient through teleconference system                                                                                                                                                                          |
| 2. Short introduction about aim and procedures                                                                                                                                                                                               |
| 3. Informed consent                                                                                                                                                                                                                          |
| 4. Clinical interview: Demographic information, Medical history, Subjective memory complaint; Scales: Subjective Cognitive Functioning (SCF- 4 items) <sup>17</sup> , Mood (GDS-15 item) <sup>18</sup> , Apathy Inventory (IA) <sup>19</sup> |
| 5. Test of global cognition (MMSE <sup>20</sup> )                                                                                                                                                                                            |
| 6. Visual episodic memory test (Free and Cued Selective Reminding Test <sup>21</sup> if MMSE < 20; 5-word test of Dubois <sup>22</sup> )                                                                                                     |

|    |                                                                                                  |
|----|--------------------------------------------------------------------------------------------------|
| 1  | 7. Praxis Test <sup>23</sup>                                                                     |
| 2  |                                                                                                  |
| 3  | 8. Visual recognition test (Doors and People Test) <sup>24</sup>                                 |
| 4  |                                                                                                  |
| 5  | 9. Working memory task (Digit Span Test) <sup>25</sup>                                           |
| 6  |                                                                                                  |
| 7  | 10. Open questions (positive/negative story telling) <sup>26</sup>                               |
| 8  |                                                                                                  |
| 9  | 11. Verbal episodic memory recall                                                                |
| 10 |                                                                                                  |
| 11 | 12. Stroop test <sup>27</sup>                                                                    |
| 12 |                                                                                                  |
| 13 | 13. Semantic (animals/fruits) and Phonemic ('p'/'r') fluency tasks <sup>27</sup>                 |
| 14 |                                                                                                  |
| 15 | 14. Picture description (Cookie Theft picture) <sup>28</sup>                                     |
| 16 |                                                                                                  |
| 17 | 15. Denomination task (Lexis <sup>29</sup> /DO80 <sup>30</sup> )                                 |
| 18 |                                                                                                  |
| 19 | 13. Completion of conversation with patient, including providing information about the procedure |
| 20 | of the study (face-to-face assessment)                                                           |
| 21 |                                                                                                  |
| 22 | 14. User experience questionnaire ( <i>copy under supplementary file</i> )                       |
| 23 |                                                                                                  |
| 24 |                                                                                                  |
| 25 |                                                                                                  |
| 26 |                                                                                                  |
| 27 |                                                                                                  |
| 28 |                                                                                                  |
| 29 |                                                                                                  |
| 30 |                                                                                                  |
| 31 |                                                                                                  |
| 32 |                                                                                                  |
| 33 |                                                                                                  |
| 34 |                                                                                                  |
| 35 |                                                                                                  |
| 36 |                                                                                                  |
| 37 |                                                                                                  |
| 38 |                                                                                                  |
| 39 |                                                                                                  |
| 40 |                                                                                                  |
| 41 |                                                                                                  |
| 42 |                                                                                                  |
| 43 |                                                                                                  |
| 44 |                                                                                                  |
| 45 |                                                                                                  |
| 46 |                                                                                                  |
| 47 |                                                                                                  |
| 48 |                                                                                                  |
| 49 |                                                                                                  |
| 50 |                                                                                                  |
| 51 |                                                                                                  |
| 52 |                                                                                                  |
| 53 |                                                                                                  |
| 54 |                                                                                                  |
| 55 |                                                                                                  |
| 56 |                                                                                                  |
| 57 |                                                                                                  |
| 58 |                                                                                                  |
| 59 |                                                                                                  |
| 60 |                                                                                                  |

Table 1. Protocol overview

#### Technical Description of the videoconference system

The videoconference system (or telemedicine) tool was internally developed as a web-based platform, using common web-development technologies and libraries (JavaScript, Node.JS, HTML, etc.). No Skype, Zoom, or other existing videoconferencing systems were involved. A secured server allows connecting two clients (clinician and patient) through the two interfaces described in Figure 1. Both clinician and patient connect to the platform through any existing web browsers (Chrome, Firefox, Safari, Edge) under any operating system that supports webRTC standard. WebRTC<sup>1</sup> (Web Real-Time Communication) is a free, open-source project providing web browsers and mobile applications with real-time communication (RTC) via

<sup>1</sup> <https://en.wikipedia.org/wiki/WebRTC>

1  
2  
3 simple application programming interfaces (APIs). It allows audio and video communication  
4 to work inside web pages by allowing direct peer-to-peer communication, eliminating the need  
5 to install plugins or download native apps.  
6  
7

8 Since the communication between the clinician and the patient is made directly through the  
9 web, the used devices (camera, microphone and speakers) are either the built-in devices when  
10 a laptop is used (in the van), or externally attached to the PC (in the case of a desktop computer  
11 for example/in the clinic). For a tablet or a smartphone, the integrated hardware devices can be  
12 used.  
13  
14  
15  
16

17  
18 The implemented clinical tests are normalised tests used by neuropsychologists and related  
19 medical professionals. The following three types of clinical tests will be used:  
20

21 (1) tests which do not require sharing any visual contents (such as verbal fluency). For these  
22 tests, any device can be used (smartphone, tablet, PC, laptops with the integrated webcams,  
23 microphones and speakers).  
24  
25  
26

27 (2) tests which require sharing visual contents (images, words, pictures ...). For these tests, the  
28 content should be visible to the patient, and using small devices such as smartphones can lead  
29 to bad perception of the visual contents. In the face-to-face clinical assessments, we use pen  
30 and paper, and the size of the visual contents are normed with a minimum size (size of a picture,  
31 size of a word or a figure). For this reason we recommend a minimum size of 10 inch for the  
32 screen of the used device, so some tablets can be used, in addition to laptops and PCs; however  
33 for such tests, a smartphone is not recommended.  
34  
35  
36  
37  
38

39 (3) for few tests, the medical professional needs to see the hands of the patient and generally  
40 the upper body (such as psychometric tests); for such tests a wide-angle camera is needed.  
41  
42  
43

44 For practical reasons, we will use a laptop or a desktop with a minimum of a 17-inch screen  
45 width. This will make the clinical tests' contents (images and text) visible for the patients. In  
46 addition, we will use a wide-angle camera, especially for the patient's side, in order to allow  
47 the clinician to see the upper body of the patient to be able to observe gestures. This is  
48 particularly important for some clinical tests, in which seeing the patient's hands is required.  
49  
50  
51

52 The videoconferencing communication requires a dedicated server to allow the transmission of  
53 different information between the two clients (clinician and patient). Servers to store different  
54 data (database, patients' information, videos, speech recordings, scores ...); and to run the  
55 different services allowing the videoconferencing communication are mandatory. All the  
56  
57  
58  
59  
60

1  
2  
3 servers will be hosted in dedicated and regulated infrastructure such as the ones of the clinical  
4 partners, and thus respect the legislation related to health data and privacy.

5  
6 The developed system is linked to third parties cloud infrastructures allowing speech and video  
7 analysis. For the planned clinical study, audio and video data will be stored on secured servers.

8  
9 The processing of this data is done according to the procedure explained under Data processing.

10  
11 The use of speech and video analysis, in addition to providing potential digital biomarkers,  
12 helps in overcoming both the physical absence of the patient and the lack of sophisticated and  
13 complex observation devices (such as Pan-Tilt-Zoom “PTZ” cameras). By providing the  
14 clinician with meaningful information about the patient’s behaviors and state (comfort, fatigue,  
15 stress), the physical distance can be potentially compensated for.  
16  
17  
18  
19  
20  
21  
22  
23  
24  
25  
26  
27  
28  
29  
30  
31  
32  
33  
34  
35  
36  
37  
38  
39  
40  
41  
42  
43  
44  
45  
46  
47  
48  
49  
50  
51  
52  
53  
54  
55  
56  
57  
58  
59  
60

## Data collection, management and analysis

### *Data Collection*

Data will be collected at the Hospital Center in Digne-les-Bains; the assessments will be performed remotely and face-to-face by clinicians from the Memory Clinic in Nice. For remote assessments, the videoconference software will record test scores, video, and speech and store them on a dedicated secured server complying with healthcare data hosting regulations. Other clinical and neuropsychological data collected by the clinicians will follow the standard practice of the center.

Prior to initial participation in the study, each participant will consent on paper, or an alternate decision-maker will consent and the participant will provide assent. Each individual (or dyad) will be given as much time as they need to review the consent form and decide whether they want to participate. The consent only needs to be provided once, before initial participation in the study.

Subsequent completion of additional sessions will not require additional consent. Each participant will be associated with a unique, randomly generated, non-personally-identifying number (“participant ID”). During their first session, upon providing consent to participate, the participant will be asked to provide general demographic data (e.g., month and year of birth, sex, number of years of education, spoken languages, previous history of dementia, etc.); responses will be associated with the appropriate participant ID. If consent is provided by an alternate decision-maker, the participant’s data will be collected from the designated proxy. This information will be used to control for confounding variables when conducting analyses of the collected data and will only be reported anonymously or in aggregate.

### *Data availability*

Since we will collect highly sensitive data, only processed data can be shared with third-party institutions and the collected data will not be made publicly available.

### *Acceptability evaluation*

All participants will be asked to answer a questionnaire (*copy under supplementary file*) on the acceptance of the videoconference as well as of the face-to-face modality for cognitive testing including 7 questions with a response ranging from 1 to 7, where 1=I strongly disagree and 7=I



1  
2  
3 strongly agree. This questionnaire is based on the ‘System Usability Scale’<sup>31</sup> and assesses  
4 the user experience, including an overall evaluation, participant satisfaction, if they would  
5 repeat the experience, attitudes, and clarity of instructions as well as what type of method is  
6 preferred and why . After each question, participants have the option to add a comment.  
7  
8 The three following open questions are included at the end of the questionnaire: What was  
9  
10 missing or disappointing in your experience? What do you like most/least about this procedure?  
11  
12 What is the one thing we could do to make it better?  
13  
14  
15

16 Descriptive statistics will be performed on the obtained scores. Thematic qualitative analysis  
17 will be applied to the comments and written answers to the questionnaires.  
18  
19

20 Focus group discussions with some participants will be recorded and transcribed. We will then  
21 rearrange the comments so that answers are together for each interview question. For each  
22 question we will note the main ideas that occur in the answers. Recurring main ideas will be  
23 used to identify themes which in turn will be illustrated by quotations. The analysis results  
24 will be described in a narrative report will be thematic analysis on the transcripts of the different  
25 responses as well as on feedback provided during informal focus group discussions with  
26 participants to presenting the user experiences and define encountered problems and points of  
27 improvement of the system.  
28  
29  
30  
31  
32  
33  
34  
35  
36  
37

### 38 *Speech data*

39 The speech of the different participants will be recorded as audio files for different cognitive  
40 tests. Depending on the test, the recorded speech will be either free speech or direct answers to  
41 questions, or verbal or visual stimuli.  
42  
43  
44

45 We will directly record the speech of the patients. From the audio files, we will use automatic  
46 speech recognition (ASR) to obtain textual transcripts of the recordings. A subset of the data  
47 will be manually transcribed to compare results between automated and manual transcriptions.  
48 We will use either the internal microphone of the device (PC or tablet) or an external  
49 microphone for better recording quality. The recorded data will be automatically stored on the  
50 secured server.  
51  
52  
53  
54  
55  
56  
57  
58  
59  
60

### *Video data*

Towards our general goal to detect and remotely monitor cognitive decline in the context of dementia in a partially automated way, we intend to support the proposed speech analysis by a complementary computer-vision based analysis. Such analysis exploits advanced methods related to automated face analysis, tracking, detection, and recognition, as well as human behavior analysis.

Firstly, we plan to record 2D video data from all participants for the computer vision-based analysis. Then, we intend to analyze this data with a focus on finding facial/gestural behaviors and facial/gestural activities that are representative for cognitive performance and neuropsychiatric symptoms of dementia in different situations, such as free speech interviews, and in some cognitive tests (e.g., patients are encouraged to describe the content of a series of images).

We intend to acquire the video data using the integrated web camera of the device (PC or Tablet) used for the telemedicine session. Possible use of an external web camera connected to a PC is also considered. In both cases, the recorded data will be automatically stored on the secured server.

### *Stress measure data*

We would like to explore the use of additional objective markers of stress levels within this study. For this, for only a subgroup of participants (during the mobile home unit phase), we will extract through the Empatica E4 device physiological data during both administration methods:

- Electro-Dermal Activity (EDA): measures sympathetic nervous system activity manifested through the skin, by measuring the constantly fluctuating changes in certain electrical properties of the skin;
- Heart Rate Variability (HRV): derived from measuring Blood Volume Pulse (BVP);
- Peripheral Skin temperature: measured using an integrated Infrared Thermopile;
- 3-axis Accelerometer: captures motion-based activity, which identifies intensity and frequency of movements that could be a seizure.

1  
2  
3 We aim to compare the different time point measures with each other to assess the stress levels  
4 of the participants during the face-to-face and the remote assessment administration.  
5  
6  
7  
8

9 *Data security*

10 A collection of data will be made with the videoconferencing web-based platform (telemedicine  
11 tool). Digital data (audio, video, recorded scores, answers to questionnaires), as well as written  
12 records will be collected.  
13  
14  
15  
16

17  
18 Concerning the paper data, these will be stored in armoires with access limited to clinicians  
19 participating in the study (a key is needed for access). Each involved clinical partner will store  
20 these papers in their clinic. The data will be digitized through the web-platform to conduct the  
21 research work. In the following paragraphs, we provide details about the security of all digital  
22 data.  
23  
24  
25  
26

27  
28 To perform the study, a secured connection to the web-platform is required by both clinicians  
29 and participant subjects. The secured and encrypted connection (i.e., HTTPS) requires  
30 authentication with an email address and an encrypted password. Only limited email addresses'  
31 domains will be allowed to connect to the web-platform. The clinician should have a  
32 professional email that is provided by their organization (such as "@chu-nice.fr", "@ch-  
33 digne.fr" ...). Only the domains of clinical partners involved in the clinical study will be  
34 allowed.  
35  
36  
37  
38  
39  
40

41  
42 The enrolled subjects will have authorized access to the web-platform with their email and a  
43 generated temporary password valid only for the time of their participation in the study. The  
44 password will be entered by the person accompanying the subject (a clinician, part of the  
45 clinical study) to connect the subject to the platform. For the subjects who have no email, a  
46 unique identifier (temporary email) will be provided.  
47  
48  
49  
50  
51

52 The data collected during the study will be stored in a secured encrypted database. The database  
53 will be hosted by the Institute Claude Pompidou (ICP) servers. These servers are owned and  
54 part of the University Hospital of Nice (CHU NICE). These servers are secure and follow all  
55 the required security and healthcare data hosting regulations. The security of the servers is  
56  
57  
58  
59  
60

1  
2  
3 managed by the IT personnel of CHU NICE who has to sign a confidentiality agreement and  
4 only has access to anonymised clinical data  
5  
6  
7

8 An IT technician from the ICP will maintain the anonymised database. The technician will have  
9 all the rights on the database:

- 11 ● Create/delete/edit the list of clinicians who can access the web-platform.
- 12 ● Create/delete/edit the list of subjects participating in the clinical study.
- 13
- 14
- 15
- 16

17 Regarding the mobile van, the technician is only there before the consultation to ensure the  
18 technical equipment is working correctly, then he will leave the van.  
19

20  
21 The authorized clinicians will have the right to access to the web-interface, which will allow  
22 them to perform the study. The collected data will automatically be stored in the database.

23 Access to the stored data is strictly reserved to the clinicians with a secured account. The type  
24 of database is MySQL Database. The security of the database is ensured by AES (Advanced  
25 Encryption Standard) techniques. The following rules will be applied:  
26  
27

- 28 ● the database will only be accessible from trusted hosts,
- 29 ● no use of data from input without filtering,
- 30 ● all types of data will be protected,
- 31 ● the administrator of the database will not be a user (the IT technician) of the web  
32 platform.  
33  
34  
35  
36  
37  
38  
39

40 Security of transmission between clinicians and participants during study sessions: After the  
41 clinician and the participant are connected to the platform, video streams are circulating in both  
42 directions. Video stream are protected by integrating the following rules:  
43  
44

- 45 ● The sessions of the clinical study will be scheduled by the involved clinicians and will  
46 not be publicly known.
- 47 ● We will add a signaling protocol that will provide encryption of signaling traffic.
- 48 ● The connection between the clinician and the patient will be a P2P connection, the  
49 media contents (audio and video channels) will be transmitted between peers directly in  
50 full duplex. Thus, as the signaling server maintains the number of peers in  
51 communication, we will monitor the connection for additional suspicious peers in a call  
52 session. If the number of peers actually present on signaling server is more than the  
53  
54  
55  
56  
57  
58  
59  
60

1  
2  
3 number of peers interacting on the connection, then it could mean that someone is  
4 eavesdropping secretly and should be terminated from session access by force.

- 5  
6  
7 ● Request permission from both sides to use the camera and the microphone.  
8  
9

10 The dissemination of the research results will be based on the analysis of generated pseudo-  
11 anonymous data, which doesn't include any information that would allow any reference to the  
12 identity of participants.  
13  
14

### 15 16 17 18 *Data processing* 19

20 The collected data will be processed to generate pseudo-anonymous metadata, which will be  
21 used by the different technical and clinical partners of the project. These technical partners (who  
22 are not the clinicians involved in passing the tests and authorized to access the participant  
23 data) will never have access to the raw data: identity of the patient, personnel information,  
24 videos and audio or any other information which allows identifying the subject. The only  
25 processed data will be: scores of tests, videos and audio files. The processing will be done on  
26 the servers of the Institut Claude Pompidou, a processing which will generate anonymous  
27 metadata which will be transmitted by the IT technician to the partners with no information  
28 about the identity of the participants.  
29

30 Concretely, an IT technician (or engineer) working for the Institut Claude Pompidou, and  
31 authorized to access all patient's data as part of his duties (creating patients records, correcting  
32 information about patient information, etc.) will be the only non-clinical person who can access  
33 the identifying data of the participants (speech and video recordings). This IT technician will  
34 be trained by the technical partners (using similar non-confidential data that does not belong to  
35 the participants), for training on relevant software -provided by the technical partners-to  
36 generate pseudo-anonymous metadata: low-level features extracted from speech and video such  
37 as signal intensities, acoustic characteristics, 2D points positions, and head/eyes positions in  
38 different images. This pseudo-anonymized metadata will not contain the identity of the  
39 participants. For each participant, a random code will be assigned, known only by the IT  
40 technician and the clinicians involved in the study. All the metadata extracted by the different  
41 software and executed only by the IT technician will then be transmitted in a pseudo-  
42 anonymous manner: the technical partners will not know the identity of the participants, and  
43 they will only have access to a set of metadata matched to an unidentifiable code.  
44  
45  
46  
47  
48  
49  
50  
51  
52  
53  
54  
55  
56  
57  
58  
59  
60

1  
2  
3 In order to perform the processing of the data, other pseudo-anonymous data could be  
4 transmitted to the technical partners such as tests' scores and values of different clinical scales.  
5  
6  
7

8 The data will be stored for a maximum period of 3 years. This time period will allow us to do  
9 the research work, analyze the data and publish results.  
10  
11  
12  
13  
14  
15  
16  
17  
18  
19

### 20 *Analysis*

21  
22 In this study, we will mainly work on the analysis of three types of data: speech, video and tests  
23 scores, including multimodal analysis combining the three data types.  
24  
25  
26

27 To verify the agreement between both administration procedures, we will compare the face-to-  
28 face test results with the videoconference-based test results. For this, the mean and standard  
29 deviations for each test score will be calculated. Intraclass correlation coefficients will be used  
30 to assess agreement between the two testing formats. The ANOVA test will be used to assess  
31 if the administration modality (independent variable) was associated with any difference in total  
32 scores of the different tests (dependent variables).  
33  
34  
35  
36  
37  
38  
39

### 40 *Speech analysis*

41  
42 The audio and transcribed text data will be processed to obtain acoustic, lexico-syntactic, and  
43 semantic features. First, acoustic features will be extracted from the audio samples. The audio  
44 data will be passed through frequency domain transformations to obtain standard acoustic  
45 measures used in language processing, such as Mel frequency cepstral coefficients (MFCCs)  
46 based on the cepstral representation of the acoustic signal which detects periodicity in its  
47 spectrum, jitter, and shimmer measures based on irregularities in signal periodicity, recurrence  
48 period density entropy (RPDE) and pitch period entropy (PPE) based on measures of  
49 aperiodicity and noise in the signal, measures based on the frequency domain harmonics, signal  
50 to noise ratios, and filled and unfilled pause features, among others. Similar work was  
51 previously performed for the detection of signs of apathy<sup>26</sup>.  
52  
53  
54  
55  
56  
57  
58  
59  
60

1  
2  
3 Second, syntactic measures will be obtained from transcriptions of the verbal and written  
4 responses. The text transcripts will be parsed with a standard probabilistic context-free grammar  
5 parser, and the resulting parse trees will be searched for the presence of specific syntactic  
6 constructions. Extracted syntactic features include the depth of syntactic parse trees, use of  
7 subordinate and coordinate clauses, use of passive voice, use of different types of syntactic  
8 constructions (e.g., noun phrases, auxiliary verb phrases, etc.), and mean length of utterance,  
9 among others. Lexical features will be extracted from part of speech tagged transcriptions and  
10 written responses; these include relative word-class usage, lexical richness evaluated using  
11 standard measures such as type-to-token ratio (TTR) and Honoré's statistic, average age of  
12 acquisition, familiarity, and imageability, among others.

21  
22 Lastly, semantic features will be extracted from the transcriptions based on the criteria of the  
23 corresponding language task, e.g., qualitative features from the semantic verbal fluency tasks<sup>32-</sup>  
24 <sup>34</sup> or recall and precision-based measures of semantic content units present in a picture  
25 description task<sup>35</sup>. Other relevant acoustic and linguistic features may also be computed.  
26 Standard statistical testing techniques (e.g., t-test, ANOVA) will be used to determine the  
27 significance of any trends, which are detected in the data.

### 35 *Video analysis*

37 For the video analysis, we will first annotate the data in an initial step to find similar video  
38 sequences (e.g., such as depicted patients talking, as well as such showing smiles or neutral  
39 states). From these annotated sequences, features that target behavioral analysis<sup>36-37</sup> will be  
40 extracted. Specifically, we will use algorithms for face detection and then extract dense  
41 trajectories from the video sequence and represent these with facial spatio-temporal features,  
42 which incorporate motion of sampled points in the video sequence. Using the extracted features,  
43 emotions and engagement of the patients will be computed. Combining the features from video  
44 and speech analysis, we will perform an analysis to correlate the emotions expressed by a  
45 patient and their engagement during the cognitive tests with the cognitive disorders they could  
46 be affected with. In particular, the engagement information of a patient during a test will be  
47 used as an indicator of the success and the efficiency of a cognitive test. Our approach will be  
48 validated by the acquired data, as well as by benchmark datasets, which are publicly available.  
49 The recorded data will only be used to develop, test, and validate algorithms (analysis,  
50 classification, deep-learning, etc.) and will be deleted after the study.

## Ethics and Dissemination

The procedures are not invasive and there are no expected risks or burdens to participants. All participants will be informed that this is an observational study and their consent taken prior to the experiment. Participants with cognitive impairment may experience feelings of confusion, anxiety, distress, embarrassment, or sadness during participation. We mitigate against this by explaining sufficiently beforehand the procedure, answering possible questions and keeping the session relatively short. In situations where a participant is significantly distressed as a result of participating in the study, the clinician will stop the session. Participants may withdraw from the study completely at any time. No other known risks to the participants exist. After completion of the tests, each participant will receive feedback on her/his performance as well as a summary report will be sent to the referring practitioner.

Confidentiality aspects such as data encryption and storage comply with the GDPR and the requirements from sponsoring bodies and ethical committees. Results from this study will be published in peer-reviewed journals. However, all communications will only include results on analyses undertaken after pre-processing the recordings, ensuring that audio-visual data will never be published or disseminated. The results of the study will be published in peer-reviewed journals.

The project will enable the validation of technology that allows the implementation of sophisticated and unobtrusive remote neuropsychological assessment, eventually at home or at easily reachable locations to facilitate access to clinical experts. The solution will furthermore allow for easier recruitment and onboarding of people living isolated in rural areas into clinical trials who, are until today, underrepresented due to the lack of access to clinical sites.

## Conclusions

Demonstration of the effectiveness of this technology may later make it possible to diffuse its use across all rural areas ('medical deserts') in France and thus improve the early diagnosis of neurodegenerative pathologies while providing data crucial for basic research. Ultimately, it will lead to an improvement of health care access and care of isolated seniors in these regions. Furthermore, recruitment, onboarding, and monitoring of potential candidates in these regions



1  
2  
3 for clinical trials will be facilitated. Pushing the use of such remote solutions in the future is of  
4 particular relevance given the current context of the COVID19 pandemic.  
5  
6  
7

### 8 **Acknowledgements**

9  
10 This research is funded by the EIT Health Activity 19249, DeepSPA, with great support from  
11 Modis Belgium, Janssen Clinical Innovation, the Association IA, ADMR 04, and the Centre  
12 Hospitalier and the city of Digne-les-bains, France. Special thanks to Valérie DEPRAD  
13 President, Francis Kuhn and Emmanuelle Martin Vice-President of ADMR 04.  
14  
15  
16  
17

### 18 **Contributorship statement**

19  
20 Conceptualization, A.K., R.Z., R.G., K.L., I.R., P.R.; methodology, R.Z., A.K., I.R.; software,  
21 R.G., M.D.T., F.B.; validation, R.Z., A.K., P.L., V.B.; formal analysis, N.L., H.L., R.Z.;  
22 investigation, R.Z., A.K., P.L., V.B., resources, P.R., P.L., V.B.; data curation, R.G., F.B.,  
23 M.D.T.; writing—original draft preparation, A.K., R.Z., R.G.; visualization, R.Z., R.G.;  
24 supervision, P.R., F.B.; project administration, A.K., F.B.; funding acquisition, F.B., P.R. All  
25 authors have read and agreed to the published version of the manuscript.  
26  
27  
28  
29  
30  
31

### 32 **Competing interest statement**

33  
34 We have read and understood BMJ policy on declaration of interests. Nicklas Linz is an  
35 employee and shareholder of ki elements UG.  
36  
37  
38

### 39 **Funding Statement**

40  
41 This work is supported by the European Institute for Innovation and Technology (EIT) –  
42 Health, grant number 19249.  
43  
44  
45  
46

### 47 **References**

- 48  
49  
50 1. Armitage R, Nellums LB. COVID-19 and the consequences of isolating the elderly.  
51 Lancet Public Health. 2020 May;5(5):e256. doi: 10.1016/S2468-2667(20)30061-X.  
52 Epub 2020 Mar 20. PMID: 32199471; PMCID: PMC7104160.  
53  
54 2. Rakesh G, Szabo ST, Alexopoulos GS, Zannas AS. Strategies for dementia prevention:  
55 latest evidence and implications. Ther Adv Chronic Dis. 2017;8(8-9):121-136.  
56 doi:10.1177/2040622317712442  
57  
58  
59  
60

3. Robert, PH, Konig, A, Andrieu, S, Bremond, F, Chemin, I, Chung, PC, Dartigues, JF, Dubois, B, Feutren, G, Guillemaud, R, Kenisberg, PA, Nave, S, Vellas, B, Verhey, F, Yesavage, J, and Mallea, P, Recommendations for ICT Use in Alzheimer's Disease Assessment: Monaco CTAD Expert Meeting. *J Nutr Health Aging*, 2013. 17(8): p. 653-60
4. Kim H, Jhoo JH, Jang J. The effect of telemedicine on cognitive decline in patients with dementia. *J Telemed Telecare* 2017 Jan;23(1):149-154.
5. Timpano F, Pirrotta F, Bonanno L, et al: Videoconference-based mini mental state examination: a validation study. *Telemed J E Health* 2013; 19:931–937
6. Haralambous, B, Subramaniam, S, Hwang, K, Dow, B, LoGiudice, D. A narrative review of the evidence regarding the use of telemedicine to deliver video-interpreting during dementia assessments for older people. *Asia-Pacific Psychiatry*. 2019; 11:e12355. <https://doi.org/10.1111/appy.12355>
7. Barth, J., Nickel, F., & Kolominsky-Rabas, P.L. (2018). Diagnosis of cognitive decline and dementia in rural areas - A scoping review. *International journal of geriatric psychiatry*, 33 3, 459-474 .
8. Brearly, T.W., Shura, R.D., Martindale, S.L., Lazowski, R.A., Luxton, D.D., Shenal, B.V., & Rowland, J.A. (2017). Neuropsychological Test Administration by Videoconference: A Systematic Review and Meta-Analysis. *Neuropsychology Review*, 27, 174-186.
9. Dario C, Luisotto E, Dal Pozzo E, et al. Assessment of Patients' Perception of Telemedicine Services Using the Service User Technology Acceptability Questionnaire. *Int J Integr Care*. 2016;16(2):13. Published 2016 Jun 1. doi:10.5334/ijic.2219
10. Cummins, N, Scherer, S, Krajewski, J, Schnieder, S, Epps, J and Quatieri, T. A review of depression and suicide risk assessment using speech analysis. *Speech Communication*, vol. 17, pp. 10–49, 2015.
11. Valstar, M & Pantic, M & Gratch, Jonathan & Schuller, Björn & Ringeval, Fabien & Lalanne, Denis & Torres Torres, Mercedes & Scherer, Stefan & Stratou, Giota & Cowie, Roddy. (2016). AVEC 2016: Depression, Mood, and Emotion Recognition Workshop and Challenge. 3-10. 10.1145/2988257.2988258.
12. Dewan, M.A.A., Murshed, M. & Lin, F. Engagement detection in online learning: a review. *Smart Learn. Environ*. 6, 1 (2019). <https://doi.org/10.1186/s40561-018-0080-z>

- 1  
2  
3 13. Asteriadis, S., Karpouzis, K., & Kollias, S. (2011). The Importance of Eye Gaze and  
4 Head Pose to Estimating Levels of Attention The importance of Eye Gaze and Head  
5 Pose to estimating levels of Attention, (June). <https://doi.org/10.1109/VSGAMES.2011.38>  
6  
7  
8  
9
- 10 14. Scherer, S., Stratou, G., Lucas, G., Mahmoud, M., Boberg, J., Gratch, J., Rizzo, A., &  
11 Morency, L. (2014). Automatic audiovisual behavior descriptors for psychological  
12 disorder analysis. *Image Vis. Comput.*, 32, 648-658.  
13  
14
- 15 15. Armaignac DL, Saxena A, Rubens M, et al. Impact of Telemedicine on Mortality,  
16 Length of Stay, and Cost Among Patients in Progressive Care Units: Experience From  
17 a Large Healthcare System. *Crit Care Med.* 2018;46(5):728-735.  
18 doi:10.1097/CCM.0000000000002994  
19  
20
- 21 16. URL : <https://www.empatica.com/en-eu/research/e4/>  
22  
23
- 24 17. Aalten P, Ramakers IH, Biessels GJ, de Deyn PP, Koek HL, OldeRikkert MG, Oleksik  
25 AM, Richard E, Smits LL, van Swieten JC, Teune LK, van der Lugt A, Barkhof F,  
26 Teunissen CE, Rozendaal N, Verhey FR, van der Flier WM. The Dutch Parelsnoer  
27 Institute--Neurodegenerative diseases; methods, design and baseline results. *BMC*  
28 *Neurol.* 2014 Dec 31;14:254. doi: 10.1186/s12883-014-0254-4. PMID: 25551191;  
29 PMCID: PMC4301568.  
30  
31  
32  
33
- 34 18. Almeida OP, Almeida SA: Short versions of the geriatric depression scale: a study of  
35 their validity for the diagnosis of a major depressive episode according to ICD-10 and  
36 DSM-IV. *Int J Geriatr Psychiatry* 1999, 14(10):858–865.  
37  
38
- 39 19. Robert PH, Clairet S, Benoit M, Koutaich J, Bertogliati C, Tible O, Caci H, Borg M,  
40 Brocker P, Bedoucha P. The apathy inventory: assessment of apathy and awareness in  
41 Alzheimer's disease, Parkinson's disease and mild cognitive impairment. *Int J Geriatr*  
42 *Psychiatry.* 2002 Dec;17(12):1099-105. doi: 10.1002/gps.755. PMID: 12461757.  
43  
44  
45
- 46 20. Folstein MF, Folstein SE, McHugh PR: "Mini-mental state". A practical method for  
47 grading the cognitive state of patients for the clinician. *J Psychiatr Res* 1975, 12(3):189–  
48 198.  
49  
50
- 51 21. Grober E, Merling A, Heimlich T, Lipton RB. Free and cued selective reminding and  
52 selective reminding in the elderly. *J Clin Exp Neuropsychol.* 1997 Oct;19(5):643-54.  
53 doi: 10.1080/01688639708403750. PMID: 9408795.  
54  
55
- 56 22. Dubois, B, Touchon, J, Portet, F, Ousset, P, Vellas, B, Michel, B (2002). The "5 words":  
57 A simple and sensitive test for the diagnosis of Alzheimer's disease. *Presse médicale*  
58 (Paris, France : 1983). 31. 1696-9.  
59  
60

23. Peigneux P, Van der Linden, M (2000) « Présentation d'une batterie neuropsychologique et cognitive pour l'évaluation de l'apraxie gestuelle », *Revue de neuropsychologie*, vol. 10, n° 2, 2000, p. 311-362
24. Baddeley A. D., Emslie H., & Nimmo-Smith I. (1994). *The Doors and People Test: A test of visual and verbal recall and recognition*. Bury-St-Edmunds, UK: Thames Valley Test Company.
25. Botwinick, J., & Storandt, M. (1974). *Memory, related functions and age*. Springfield, IL: Thomas.
26. König A, Linz N, Zeghari R, Klinge X, Tröger J, Alexandersson J, Robert P. Detecting Apathy in Older Adults with Cognitive Disorders Using Automatic Speech Analysis. *J Alzheimers Dis*. 2019;69(4):1183-1193.
27. Godefroy O, Gibbons L, Diouf M, Nyenhuis D, Roussel M, Black S, Bugnicourt JM; GREFEX study group. Validation of an integrated method for determining cognitive ability: Implications for routine assessments and clinical trials. *Cortex*. 2014 May;54:51-62. doi: 10.1016/j.cortex.2014.01.016. Epub 2014 Feb 7. PMID: 24632464; PMCID: PMC4737650.
28. Harold Goodglass, Edith Kaplan, and Barbara Barresi. 2000. *Boston Diagnostic Aphasia Examination*. Lippincott Williams & Wilkins.
29. De Partz, MP, Bilocq, V, De Wilde V., Seron, X, Pillon A. (2001). *LEXIS, Test pour le diagnostic des troubles lexicaux chez le patient aphasique*. Marseille : Solal.
30. Deloche, G, Hannequin, D. (1997). *Test de Dénomination Orale d'Images*. Paris : les Éditions du Centre de Psychologie Appliquée
31. Brooke, J. (1996). SUS: A "quick and dirty" usability scale. In P. W. Jordan, B. Thomas, B. A. Weerdmeester, & I. L. McClelland (Eds.), *Usability evaluation in industry* (pp. 189–194). London: Taylor & Francis.
32. König A, Linz N, Tröger J, Wolters M, Alexandersson J, Robert P, Fully Automatic Speech-Based Analysis of the Semantic Verbal Fluency Task. *Dement Geriatr Cogn Disord* 2018; 45(3-4):198-209
33. Linz, N, Tröger J, Alexandersson, J, Wolters, M., König, A. Robert, PH. Predicting Dementia Screening and Staging Scores From Semantic Verbal Fluency Performance. In proceedings of the IEEE International Conference on Data Mining (ICDM) - Workshop on Data Mining for Aging, Rehabilitation and Independent Assisted Living, 18-21 November 2017 New Orleans, USA.

- 1  
2  
3 34. Linz, N, Tröger J, Alexandersson, J, König, A. Using Neural Word Embeddings in the  
4 Analysis of the Clinical Semantic Verbal Fluency Task. In Proceedings of the 12th  
5 International Conference on Computational Semantics (IWCS), 19-22 September 2017  
6 Montpellier (France)  
7  
8  
9  
10 35. Fraser, K, Meltzer, J, Rudzicz, F. (2015). Linguistic Features Identify Alzheimer's  
11 Disease in Narrative Speech. *Journal of Alzheimer's disease : JAD.* 49. 10.3233/JAD-  
12 150520.  
13  
14  
15 36. J.F. Cohn, T.S. Kruez, I. Matthews, Y. Ying, M.H. Nguyen, M.T. Padilla, F. Zhou, F.  
16 De la Torre, Detecting depression from facial actions and vocal prosody, 3rd  
17 International Conference on Affective Computing and Intelligent Interaction and  
18 Workshops, 2009, pp. 1–7.  
19  
20  
21  
22 37. J. Joshi, R. Goecke, G. Parker, M. Breakspear, Can body expressions contribute to  
23 automatic depression analysis? *Proceedings of IEEE Conference on Automatic Face*  
24 *and Gesture Recognition*, 2013.  
25  
26  
27  
28  
29  
30  
31  
32  
33  
34  
35  
36  
37  
38  
39  
40  
41  
42  
43  
44  
45  
46  
47  
48  
49  
50  
51  
52  
53  
54  
55  
56  
57  
58  
59  
60

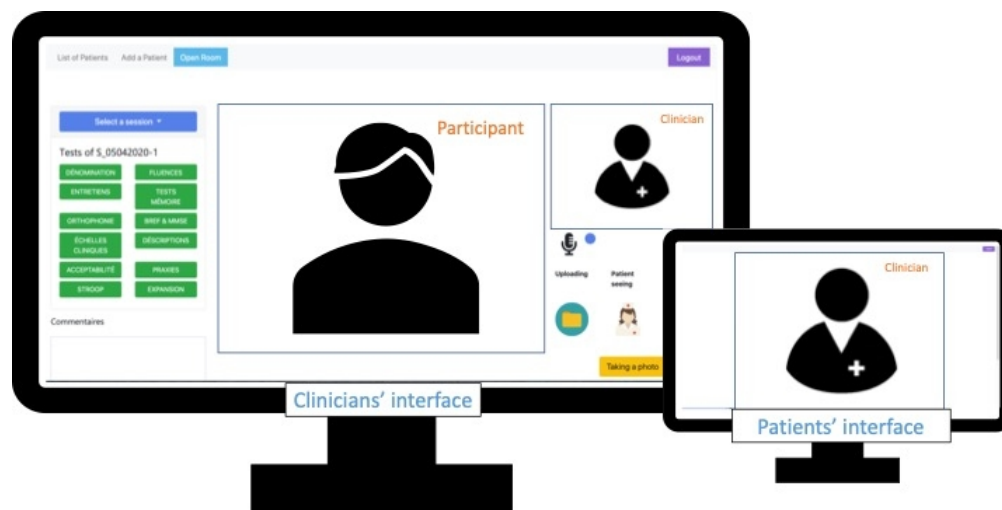

251x126mm (72 x 72 DPI)

1  
2  
3  
4  
5  
6  
7  
8  
9  
10  
11  
12  
13  
14  
15  
16  
17  
18  
19  
20  
21  
22  
23  
24  
25  
26  
27  
28  
29  
30  
31  
32  
33  
34  
35  
36  
37  
38  
39  
40  
41  
42  
43  
44  
45  
46  
47  
48  
49  
50  
51  
52  
53  
54  
55  
56  
57  
58  
59  
60

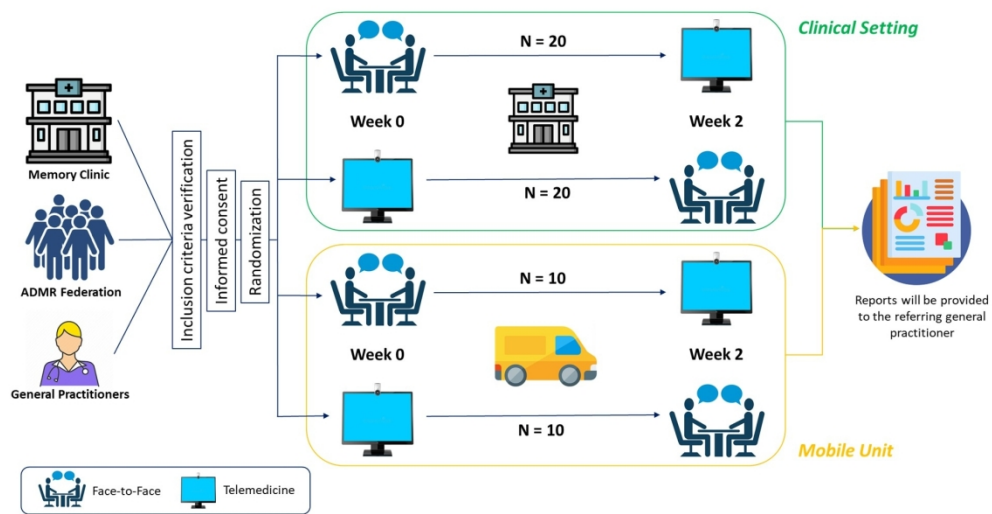

Study protocol design

329x176mm (150 x 150 DPI)

**User Experience assessment:**

Questionnaire on acceptance of the remote modality for cognitive testing

1. Overall, I am satisfied with the experience.

Strongly disagree

Strongly agree

|   |   |   |   |   |   |   |
|---|---|---|---|---|---|---|
| 1 | 2 | 3 | 4 | 5 | 6 | 7 |
|---|---|---|---|---|---|---|

Comment:

---



---



---

2. Overall, the system is easy to use.

Strongly disagree

Strongly agree

|   |   |   |   |   |   |   |
|---|---|---|---|---|---|---|
| 1 | 2 | 3 | 4 | 5 | 6 | 7 |
|---|---|---|---|---|---|---|

Comment:

---



---



---

3. The Instructions were clear and understandable

Strongly disagree

Strongly agree

|   |   |   |   |   |   |   |
|---|---|---|---|---|---|---|
| 1 | 2 | 3 | 4 | 5 | 6 | 7 |
|---|---|---|---|---|---|---|

Comment:

---



---



---

4. I would repeat the experience

Strongly disagree

Strongly agree

|   |   |   |   |   |   |   |
|---|---|---|---|---|---|---|
| 1 | 2 | 3 | 4 | 5 | 6 | 7 |
|---|---|---|---|---|---|---|

Comment:

---



---



---



5. Have you considered withdrawing from the study/experience at any time? Check your answer.

|     |    |
|-----|----|
| YES | NO |
|-----|----|

Comment:

---



---



---

6. Which evaluation method do you prefer, face-to-face or (phone) video-conferencing? Check your answer.

|                     |                               |
|---------------------|-------------------------------|
| <b>face-to-face</b> | <b>video-conference/phone</b> |
|---------------------|-------------------------------|

7. On a scale of zero to ten, how likely are you to recommend this method of evaluation to a friend or colleague?

Strongly disagree

Strongly agree

|   |   |   |   |   |   |   |   |   |    |
|---|---|---|---|---|---|---|---|---|----|
| 1 | 2 | 3 | 4 | 5 | 6 | 7 | 8 | 9 | 10 |
|---|---|---|---|---|---|---|---|---|----|

What was missing or disappointing in your experience?

---



---

What do you like most/least about this procedure?

---



---

What is the one thing we could do to make it better?

---



---
