# Supplementary material for: Remote cognitive assessment of older adults in rural areas by telemedicine and automatic speech and video analysis: protocol for a cross-over feasibility study
Source: PubMed Central journal article supplement — BMJ Open. 2021 Sep 2;11(9):e047083. doi: 10.1136/bmjopen-2020-047083 (PMC8413472; doi:10.1136/bmjopen-2020-047083), 2021-09-02
Supplement: bmjopen-2020-047083supp001.pdf [file bmjopen-2020-047083supp001.pdf]

**User Experience assessment:**

## Questionnaire on acceptance of the remote modality for cognitive testing

1. Overall, I am satisfied with the experience.

Strongly  
disagree

Strongly agree

|   |   |   |   |   |   |   |
|---|---|---|---|---|---|---|
| 1 | 2 | 3 | 4 | 5 | 6 | 7 |
|---|---|---|---|---|---|---|

Comment:

---

---

---

2. Overall, the system is easy to use.

Strongly  
disagree

Strongly agree

|   |   |   |   |   |   |   |
|---|---|---|---|---|---|---|
| 1 | 2 | 3 | 4 | 5 | 6 | 7 |
|---|---|---|---|---|---|---|

Comment:

---

---

---

3. The Instructions were clear and understandable

Strongly  
disagree

Strongly agree

|   |   |   |   |   |   |   |
|---|---|---|---|---|---|---|
| 1 | 2 | 3 | 4 | 5 | 6 | 7 |
|---|---|---|---|---|---|---|

Comment:

---

---

---

4. I would repeat the experience

Strongly  
disagree

Strongly agree

|   |   |   |   |   |   |   |
|---|---|---|---|---|---|---|
| 1 | 2 | 3 | 4 | 5 | 6 | 7 |
|---|---|---|---|---|---|---|

Comment:

---

---

---

5. Have you considered withdrawing from the study/experience at any time? Check your answer.

|     |    |
|-----|----|
| YES | NO |
|-----|----|

Comment:

---

---

---

6. Which evaluation method do you prefer, face-to-face or (phone) video-conferencing? Check your answer.

|              |                        |
|--------------|------------------------|
| face-to-face | video-conference/phone |
|--------------|------------------------|

7. On a scale of zero to ten, how likely are you to recommend this method of evaluation to a friend or colleague?

Strongly  
disagree

Strongly agree

|   |   |   |   |   |   |   |   |   |    |
|---|---|---|---|---|---|---|---|---|----|
| 1 | 2 | 3 | 4 | 5 | 6 | 7 | 8 | 9 | 10 |
|---|---|---|---|---|---|---|---|---|----|

What was missing or disappointing in your experience?

---

---

What do you like most/least about this procedure?

---

---

What is the one thing we could do to make it better?

---

---
